## RESEARCH ARTICLE

# A novel population of Hopx-dependent basal radial glial cells in the developing mouse neocortex

Samir Vaid<sup>1</sup>, J. Gray Camp<sup>2</sup>, Lena Hersemann<sup>1</sup>, Christina Eugster Oegema<sup>1</sup>, Anne-Kristin Heninger<sup>1</sup>, Sylke Winkler<sup>1</sup>, Holger Brandl<sup>1</sup>, Mihail Sarov<sup>1</sup>, Barbara Treutlein<sup>2</sup>, Wieland B. Huttner<sup>1,\*</sup> and Takashi Namba<sup>1,\*</sup>

## ABSTRACT

A specific subpopulation of neural progenitor cells, the basal radial glial cells (bRGCs) of the outer subventricular zone (OSVZ), are thought to have a key role in the evolutionary expansion of the mammalian neocortex. In the developing lissencephalic mouse neocortex, bRGCs exist at low abundance and show significant molecular differences from bRGCs in developing gyrencephalic species. Here, we demonstrate that the developing mouse medial neocortex (medNcx), in contrast to the canonically studied lateral neocortex (latNcx), exhibits an OSVZ and an abundance of bRGCs similar to that in developing gyrencephalic neocortex. Unlike bRGCs in developing mouse latNcx, the bRGCs in medNcx exhibit human bRGC-like gene expression, including expression of Hopx, a human bRGC marker. Disruption of Hopx expression in mouse embryonic medNcx and forced Hopx expression in mouse embryonic latNcx demonstrate that Hopx is required and sufficient, respectively, for bRGC abundance as found in the developing gyrencephalic neocortex. Taken together, our data identify a novel bRGC subpopulation in developing mouse medNcx that is highly related to bRGCs of developing gyrencephalic neocortex.

**KEY WORDS:** Basal radial glial cell, Development, Evolution, Hopx, Neocortex

## INTRODUCTION

Neocortex expansion is one of the hallmarks of mammalian evolution (Rakic, 2009; Lui et al., 2011; Kaas, 2013; Sun and Hevner, 2014; Bae et al., 2015; Dehay et al., 2015; Lodato and Arlotta, 2015; Fernandez et al., 2016; Lein et al., 2017; Namba and Huttner, 2017; Sousa et al., 2017; Mitchell and Silver, 2018). This expansion involves an increase in the production of neurons from neural progenitor cells during cortical development. There are two principal classes of cortical progenitors (Götz and Huttner, 2005; Lui et al., 2011; Taverna et al., 2014; Dehay et al., 2015; Fernandez et al., 2016; Namba and Huttner, 2017): first, apical progenitors (APs), notably apical (or ventricular) radial glial cells (aRGCs), which contact the ventricle, are integrated into the apical adherens junction belt, and their nuclei reside in the ventricular zone (VZ) where they undergo mitosis at the apical surface; second, basal progenitors (BPs), specifically basal intermediate progenitors (bIPs) and basal (or outer) radial glial cells (bRGCs), which are

delaminated from the ventricular surface and the apical adherens junction belt and the nuclei of which reside in the subventricular zone (SVZ) where they typically undergo mitosis. The main progeny of aRGCs are BPs, and the vast majority of the neurons generated in the developing neocortex originate from BPs (Lui et al., 2011; Dehay et al., 2015; Fernandez et al., 2016; Namba and Huttner, 2017).

In line with the latter statement, the evolutionary expansion of the neocortex has been linked to an increase in the proliferative capacity and abundance of BPs and, accordingly, in the thickness of the SVZ (Lui et al., 2011; Dehay et al., 2015; Fernandez et al., 2016; Namba and Huttner, 2017). In this context, a seminal finding was the identification and characterization of the outer SVZ (OSVZ) as the key germinal zone involved in neocortex expansion (Smart et al., 2002). Furthermore, the subsequent characterization of bRGCs (Fietz et al., 2010; Hansen et al., 2010; Reillo et al., 2011; Martinez-Cerdeno et al., 2012; Betizeau et al., 2013) provided additional insight, implicating this BP type, in particular, in cortical expansion (Lui et al., 2011; Stahl et al., 2013; Dehay et al., 2015; Fernandez et al., 2016; Namba and Huttner, 2017).

In addition to the differences in neocortex expansion among mammals, the neocortex exhibits a characteristic macroscopic feature, i.e. it is either smooth, referred to as lissencephalic, or folded, referred to as gyrencephalic (Rakic, 2009; Lui et al., 2011; Kaas, 2013; Sun and Hevner, 2014; Dehay et al., 2015; Striedter et al., 2015; Fernandez et al., 2016; Namba and Huttner, 2017). The degree of gyrencephaly varies considerably among mammals, ranging from a near-lissencephalic neocortex like that of the common marmoset to a highly folded neocortex like that of the dolphin (Lewitus et al., 2014; Striedter et al., 2015).

With regard to the specific BP type associated with lissencephaly versus gyrencephaly, the overwhelming majority of the BPs in the canonical developing lissencephalic mouse neocortex are bIPs, with only a minor proportion of bRGCs (Shitamukai et al., 2011; Wang et al., 2011; Wong et al., 2015) (low bRGC/BP proportion). In contrast, in developing gyrencephalic neocortex (such as human or rhesus monkey), bRGCs occur at high abundance (Fietz et al., 2010; Hansen et al., 2010; Reillo et al., 2011; Betizeau et al., 2013) (reviewed by Florio and Huttner, 2014; Sun and Hevner, 2014; Namba and Huttner, 2017) (high bRGC/BP proportion). Although several recent reports have shown that bRGCs exist, albeit at low abundance, in the developing mouse neocortex (Shitamukai et al., 2011; Wang et al., 2011; Wong et al., 2015), it should be emphasized that they do not exhibit a primate-like behavior unless subjected to genetic manipulation (Wong et al., 2015; Wang et al., 2016). Moreover, as shown for mouse, the bRGCs found in this lissencephalic developing neocortex exhibit a gene expression pattern that is distinct from that of the bRGCs in a developing gyrencephalic neocortex and more similar to that of bIPs (Florio et al., 2015). Specifically, mouse bRGCs express the canonical bIP

<sup>1</sup>Max Planck Institute of Molecular Cell Biology and Genetics, Pfotenhauerstraße 108, D-01307 Dresden, Germany. <sup>2</sup>Max Planck Institute for Evolutionary Anthropology, Deutscher Platz 6, D-04103 Leipzig, Germany.

\*Authors for correspondence (huttner@mpi-cbg.de; namba@mpi-cbg.de)

 W.B.H., 0000-0003-4143-7201; T.N., 0000-0003-4875-666X

marker *Tbr2* (Englund et al., 2005) that is not expressed in the majority of human bRGCs (Florio et al., 2015). Conversely, markers of human bRGCs, such as *HOPX* (Pollen et al., 2015; Nowakowski et al., 2016; Thomsen et al., 2016), have not been found to be expressed in mouse bRGCs in the dorsolateral telencephalon during embryonic corticogenesis (Fietz et al., 2012; Florio et al., 2015), although *Hopx* has been reported to be strongly expressed in the dentate gyrus of adult mouse hippocampus (De Toni et al., 2008; Li et al., 2015). There, *Hopx* has been implicated in neural progenitor cell self-renewal (De Toni et al., 2008; Li et al., 2015).

In the present study, we have identified a region of the developing mouse neocortex – the medNcx – that exhibits features found in, but not necessarily restricted to, a developing gyrencephalic neocortex, i.e. abundant bRGCs and an OSVZ-like germinal zone. Furthermore, the expression of *Hopx* in the bRGCs of mouse medNcx has prompted us to perform functional studies, which demonstrate that *Hopx* is necessary and sufficient to achieve a bRGC abundance, as found in a developing gyrencephalic neocortex.

## RESULTS

### MedNcx of embryonic mouse exhibits a thick SVZ containing a high proportion of Pax6-positive cells

At any stage of mouse embryonic development, the latNcx contains only a low proportion of bRGCs among the BPs in the SVZ (Shitamukai et al., 2011; Wang et al., 2011; Wong et al., 2015). This is in contrast to developing neocortex of gyrencephalic mammals, which exhibits a high proportion of bRGCs among BPs (Fietz et al., 2010; Hansen et al., 2010; Reillo et al., 2011; Betizeau et al., 2013). We explored whether there is any region in developing mouse neocortex that may exhibit an SVZ resembling that typically found in developing gyrencephalic neocortex, with a distinct ISVZ and OSVZ, and a high proportion of bRGCs. To this end, we first examined the mouse embryonic day (E) 14.5–18.5 neocortical germinal zones for the expression and distribution of Pax6, a transcription factor marker of RGCs (Götz et al., 1998; Osumi et al., 2008).

Consistent with findings we previously obtained with embryonic mouse neocortex, notably at mid-neurogenesis (Arai et al., 2011), we observed that in mouse E14.5, E16.5 and E18.5 latNcx, Pax6 is expressed in the VZ but is downregulated in the SVZ, with only a low proportion of SVZ nuclei being strongly Pax6<sup>+</sup> (Fig. 1A,B,F,H, and data not shown). In contrast, in the mouse medNcx at E18.5, but not at E14.5 and E16.5, Pax6 expression was observed not only in essentially all VZ nuclei, but also in a high proportion of SVZ nuclei (Fig. 1A,C,F,H).

To obtain clues to the proliferative versus neurogenic potential of the Pax6<sup>+</sup> cells in the SVZ of mouse E18.5 medNcx, we examined the expression of *Tbr2*, a transcription factor characteristic of neuronal lineage-committed cortical progenitor cells (Englund et al., 2005) that in mouse embryonic latNcx is typically found in nuclei in the basal VZ and SVZ at mid-neurogenesis (Englund et al., 2005) and at E18.5 (Fig. 1A,B). Remarkably, although largely absent from the VZ of E18.5 medNcx, *Tbr2* expression in the SVZ revealed two distinct subzones: one adjacent to the VZ in which the vast majority of nuclei were Tbr2<sup>+</sup>; and another more basally located one with a lower, yet still abundant, occurrence of Tbr2<sup>+</sup> nuclei (Fig. 1A,C).

This pattern of Pax6 and *Tbr2* expression in the SVZ of mouse E18.5 medNcx (Fig. 1A,C), in contrast to mouse embryonic latNcx (Englund et al., 2005; Arai et al., 2011) (Fig. 1A,B), was reminiscent of that reported for the developing latNcx of three gyrencephalic species, i.e. ferret, macaque and human (Fietz et al.,

2010; Hansen et al., 2010; Reillo et al., 2011; Betizeau et al., 2013). In these species, as first described for foetal monkey neocortex (Smart et al., 2002), a distinct ISVZ and OSVZ can be distinguished (Fietz et al., 2010; Hansen et al., 2010; Reillo et al., 2011; Betizeau et al., 2013). Specifically, the OSVZ/ISVZ ratio of Pax6<sup>+</sup> nuclei has been shown to be greater than that of Tbr2<sup>+</sup> nuclei (Fietz et al., 2010), as confirmed here for E36 ferret (Fig. 1D) and gestational week (GW) 15 human (Fig. 1E) latNcx. Although these stages of ferret and human cortical development are distinct from that of mouse at E18.5, the patterns of Pax6<sup>+</sup> and Tbr2<sup>+</sup> nuclei in the two SVZ subzones of mouse E18.5 medNcx (Fig. 1C) were reminiscent of those in E36 ferret and GW15 human ISVZ and OSVZ. We will therefore refer to the SVZ subzone in mouse E18.5 medNcx that is adjacent to the VZ as ISVZ, and to the more basally located one as OSVZ.

We next determined the proportion of Tbr2<sup>+</sup> nuclei in the SVZ of mouse E18.5 medNcx, as well as the distribution of Tbr2<sup>+</sup> nuclei along the radial axis of the medial cortical wall. Almost all Tbr2<sup>+</sup> nuclei (99.4±1.1%) were found to be also Pax6<sup>+</sup> at this developmental stage (Fig. 1C). We did not detect a significant difference between latNcx and medNcx in the proportion of the Pax6<sup>+</sup> nuclei that were also Tbr2<sup>+</sup> (50–60%, Fig. 1I). However, the distribution of Pax6<sup>+</sup>Tbr2<sup>-</sup> versus Pax6<sup>+</sup>Tbr2<sup>+</sup> nuclei along the radial axis of the medial cortical wall showed a striking difference. Whereas the occurrence of Pax6<sup>+</sup>Tbr2<sup>-</sup> nuclei showed a first peak in the VZ and a second peak in the region of the OSVZ adjacent to the intermediate zone (IZ), the occurrence of Pax6<sup>+</sup>Tbr2<sup>+</sup> nuclei peaked in the ISVZ and adjacent region of the OSVZ (Fig. 1G). Taken together, our data reveal the existence, in mouse E18.5 medNcx, of an ISVZ-like and an OSVZ-like layer containing both Pax6<sup>+</sup>Tbr2<sup>-</sup> and Pax6<sup>+</sup>Tbr2<sup>+</sup> cell subpopulations, suggesting that these layers constitute germinal zones harboring proliferative as well as neurogenic BPs.

### The Pax6-positive cells in the SVZ of medNcx of embryonic mouse are cycling bRGCs

As BPs comprise bIPs and bRGCs, we sought to determine whether the Pax6<sup>+</sup> cells in the SVZ of mouse E18.5 medNcx include cycling bRGCs. To achieve this, we first performed immunohistochemistry for PCNA (Arai et al., 2011), a marker of cycling cells. This revealed that – in comparison with the latNcx – the much thicker SVZ of the E18.5 medNcx contained abundant PCNA<sup>+</sup> cells, both in the ISVZ and OSVZ (Fig. 2A,B). Specifically, for both Pax6<sup>+</sup>Tbr2<sup>-</sup> and Pax6<sup>+</sup>Tbr2<sup>+</sup> cells, ~90% and 70% of the nuclei in the ISVZ and OSVZ, respectively, were PCNA<sup>+</sup> (Fig. 2C,D). These data indicate that the Pax6<sup>+</sup> cells in the SVZ of mouse E18.5 medNcx are indeed cycling.

A characteristic cell biological feature of bRGCs is that they retain a basal process and/or an apically directed process through M phase, which can be revealed, for example, by immunostaining for phosphorylated vimentin (pVim) (Fietz et al., 2010; Betizeau et al., 2013). We therefore used pVim immunohistochemistry to explore whether the cycling Pax6<sup>+</sup> cells in the SVZ of mouse E18.5 medNcx exhibited this feature. In addition, pVim immunohistochemistry provided information about the abundance and spatial distribution of mitotic cells in mouse E18.5 medNcx. When compared with the latNcx (Fig. 2E,H,I), the E18.5 medNcx, in line with its much thicker SVZ, showed a more basal relative distribution of mitotic cells (Fig. 2F,H) and contained, per area, a substantially greater number of basal mitotic cells (Fig. 2I) with a basal process (Fig. 2J). These basal pVim<sup>+</sup> cells typically expressed not only Pax6, as expected, but also the RGC marker Sox2 (see Fig. S2C). Moreover, more than half of the Pax6<sup>+</sup> basal mitotic cells exhibited a basal

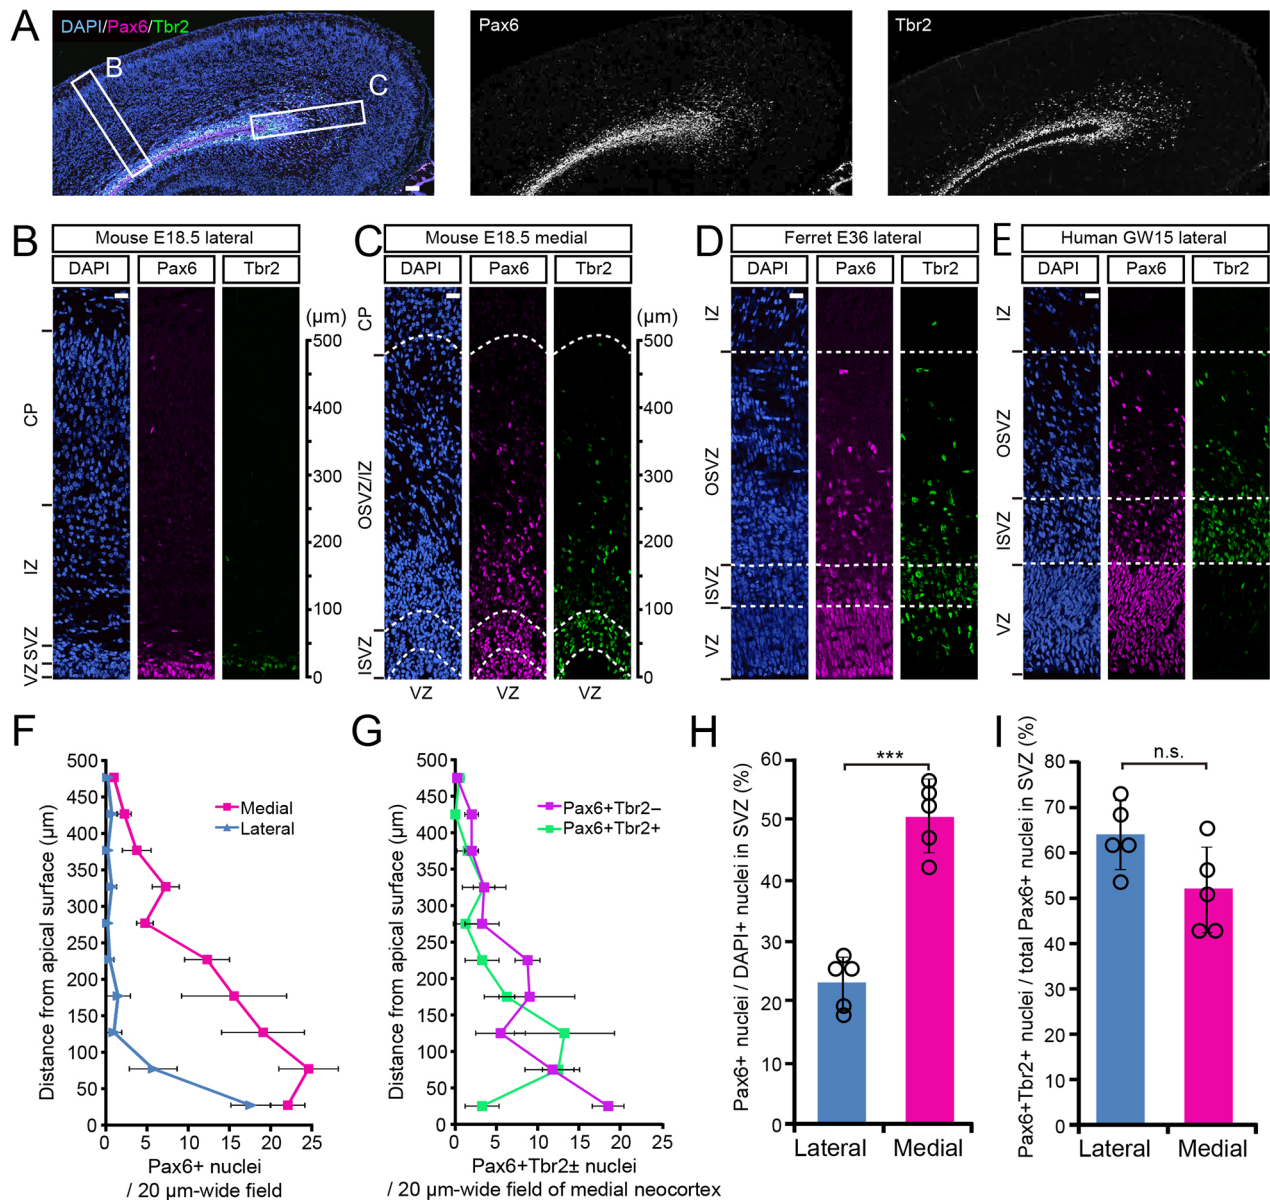

**Fig. 1. Mouse E18.5 medNcx exhibits OSVZ-like features.** (A–C) Mouse E18.5 caudal neocortex. Pax6 (magenta, white) and Tbr2 (green, white) double immunofluorescence, combined with DAPI staining (blue). (D,E) Ferret E36 latNcx (D) and human GW15 latNcx (E). Pax6 (magenta) and Tbr2 (green) double immunofluorescence, combined with DAPI staining (blue). (F) Quantification of the distribution of Pax6<sup>+</sup> nuclei along a 500 μm radial axis (divided into 10 bins) of the latNcx (blue) and medNcx (magenta). (G) Quantification of the distribution of Pax6<sup>+</sup>Tbr2<sup>-</sup> (purple) and Pax6<sup>+</sup>Tbr2<sup>+</sup> (green) nuclei along a 500 μm radial axis (divided into 10 bins) of the medNcx. (H,I) Quantification of the percentage of DAPI nuclei in the SVZ that are Pax6<sup>+</sup> (H) and of the percentage of Pax6<sup>+</sup> nuclei in the SVZ that are Tbr2<sup>+</sup> (I) in the latNcx (blue) and medNcx (magenta). (F–I) Error bars indicate s.d. \*\*\**P*<0.001, n.s., not statistically significant. Student's *t*-test in H (*n*=5 embryos) and I (*n*=5 embryos). Open circles in H and I represent individual data points. (A–E) Images in B–E are single 0.6 μm optical sections; images in A are a 15 μm merged stack. Scale bars: 50 μm in A; 20 μm in B–E.

process (Fig. 2K,L; an example of such a cell, which lacks Tbr2 expression, is shown in Fig. 2G). Based on their morphology and marker expression, we conclude that about half of the mitotic cells in the SVZ of medNcx of E18.5 mouse are cycling bRGCs.

### The progenitors in the SVZ of the medNcx of E18.5 mouse can give rise to neurons

We next investigated whether the bRGCs in medNcx of E18.5 mouse are neurogenic or gliogenic. To achieve this, we first analyzed the region of the cortical wall basal to the VZ for the expression of Olig2 (Fig. 3A,B), a marker of gliogenic precursors (Ono et al., 2009). We did not find a significant difference in the percentage of Olig2<sup>+</sup> cells

between latNcx and medNcx (Fig. 3C). However, the percentage of the Pax6<sup>+</sup>Tbr2<sup>-</sup> cells in medNcx [the majority of which are bRGCs (Fig. 2L)] that were Olig2<sup>+</sup> was significantly lower than that in latNcx (Fig. 3D), suggesting that bRGCs in the mouse E18.5 medNcx are less gliogenic than those in latNcx.

To directly determine the generation of neurons versus astrocytes that are found in medNcx when compared with the latNcx, we injected pregnant mice with 5-ethynyl-2-deoxyuridine (EdU) at E18.5. We then examined, at postnatal day (P) 10 (i.e. 11 days after EdU injection), the fate of the EdU<sup>+</sup> cells that were derived from the ones that had incorporated EdU and had reached the upper layers of the medNcx or latNcx, for the expression of NeuN, a neuron marker,

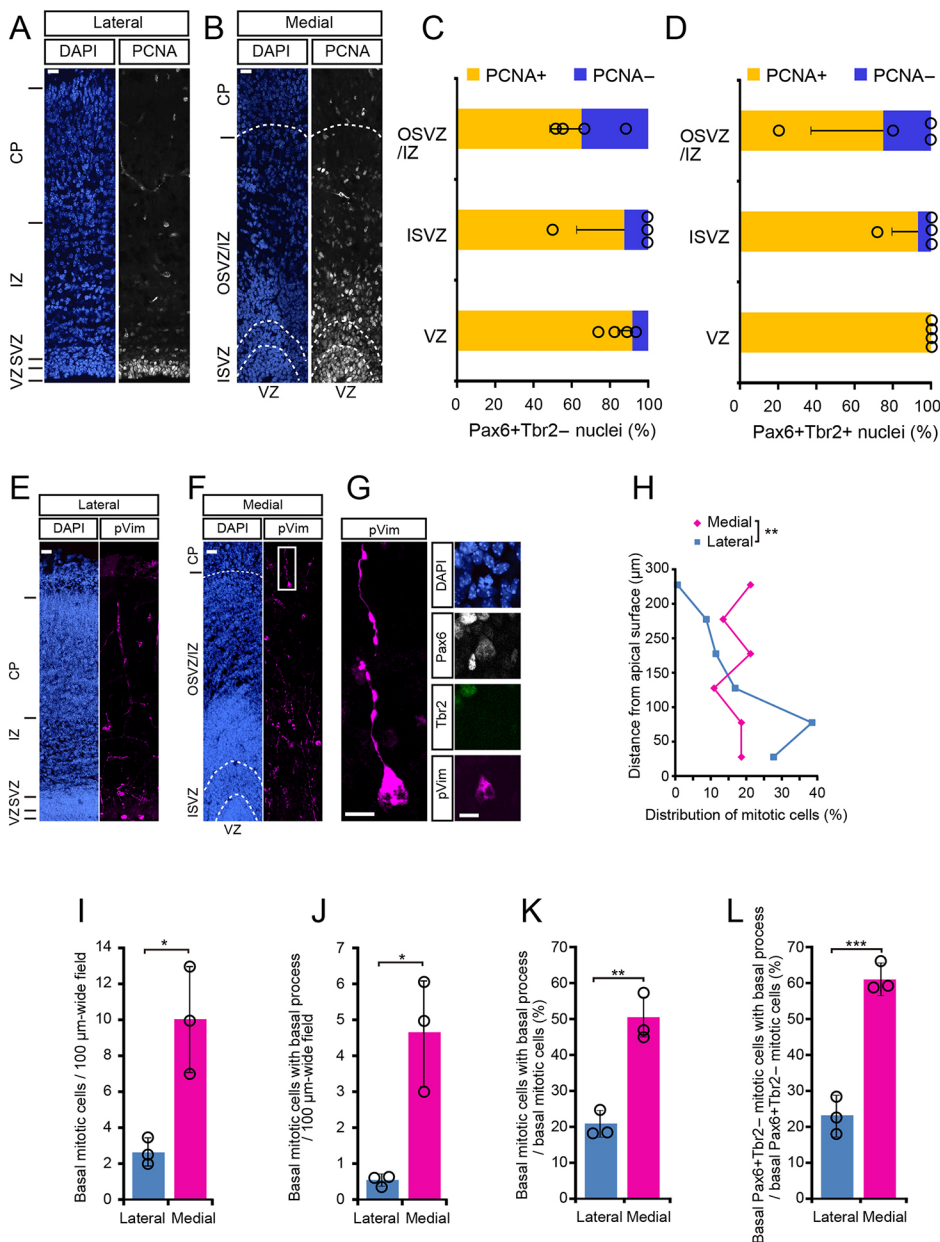

**Fig. 2. The OSVZ of the mouse medNcx contains cycling bRGCs.** (A,B) Mouse E18.5 latNcx (A) and medNcx (B). PCNA (white) immunofluorescence combined with DAPI staining (blue). (C,D) Quantification of the percentage of Pax6<sup>+</sup>Tbr2<sup>-</sup> (C) and Pax6<sup>+</sup>Tbr2<sup>+</sup> (D) nuclei that are PCNA<sup>+</sup> in the indicated zones of the mouse E18.5 medNcx. (E-G) Distribution of phosphorylated vimentin-positive (pVim<sup>+</sup>) cells in mouse E18.5 latNcx (E) and medNcx (F). pVim (magenta) immunofluorescence, combined with DAPI staining (blue). White box in F indicates the area presented at higher magnification in G, showing a pVim<sup>+</sup> cell with a basal process. Right panels in G show Pax6 (white), Tbr2 (green) and pVim (magenta) triple-immunofluorescence, combined with DAPI staining (blue) in the area of the cell body of this cell. (H) Quantification of the distribution of mitotic cells (as revealed by pVim immunofluorescence) along a 300 μm radial axis (divided into six bins) of the latNcx (blue) and medNcx (magenta). (I) Quantification of basal (>30 μm from apical surface) mitotic (pVim<sup>+</sup>) cells in the latNcx (blue) and medNcx (magenta). (J) Quantification of basal mitotic (pVim<sup>+</sup>) cells with a basal process in latNcx (blue) and medNcx (magenta). (K) Quantification of percentage of basal mitotic cells (pVim<sup>+</sup>) with a basal process in latNcx (blue) and medNcx (magenta). (L) Quantification of the percentage of basal Pax6<sup>+</sup>Tbr2<sup>-</sup> mitotic (pVim<sup>+</sup>) cells with a basal process in latNcx (blue) and medNcx (magenta). (C,D,H-L) Error bars indicate s.d.; \**P*<0.05; \*\**P*<0.01; \*\*\**P*<0.001. Mann-Whitney's *U*-test in H (*n*=56 cells in latNcx and 22 cells in medNcx); Student's *t*-test in I (*n*=3 embryos), K (*n*=3 embryos) and L (*n*=3 embryos); Welch's *t*-test in J (*n*=3 embryos). Open circles in bar graphs in C,D,I-L represent individual data points. (A,B,E-G) Images in A,B and right panels in G are single 0.4–0.6 μm optical sections; images in E,F and left panel in G are 10 μm merged stacks. Scale bars: 20 μm in A,B,E,F; 10 μm in G.

or S100β, an astrocyte marker (Fig. 3E,F,G). The percentage of the EdU<sup>+</sup> cells that expressed S100β was slightly lower in the medNcx than in the latNcx, although this difference was not statistically significant (Fig. 3H). In contrast, compared with the latNcx, the percentage of the EdU<sup>+</sup> cells that expressed NeuN was more than twofold greater in the upper layers of the medNcx (Fig. 3I). Of note, most of these E18.5-born neurons were located in the upper-most region of layer 2 (Fig. 3G). We conclude that the progenitors in mouse E18.5 medNcx exhibit a greater preference to generate neurons than those in E18.5 latNcx (for the analysis of EdU-labeled NeuN<sup>+</sup> neurons and S100β<sup>+</sup> astrocytes following an EdU pulse at P0, see Fig. S1).

**The *Hopx* protein, a human bRGC marker, is specifically expressed in the germinal zones of the mouse E18.5 medNcx**  
Taken together, the results presented so far show that the mouse E18.5 medNcx, but not latNcx, SVZ exhibits a high abundance of bRGCs and an OSVZ-like layer. We therefore explored the possibility that the

bRGCs in mouse E18.5 medNcx express genes characteristically expressed in bRGCs of developing human neocortex.

A search of the Allen Developing Mouse Brain Atlas, which covers ~2000 developmentally relevant genes (developingmouse.brain-map.org/), for genes expressed in a specific regional pattern at high intensity in E18.5 mouse forebrain yielded only one gene, the mRNA of which was specifically expressed in the medNcx: *Hopx*. *Hopx* is a homeodomain-only protein that does not bind to DNA and is the smallest member of the homeodomain-containing protein family (Mariotto et al., 2016). Although *Hopx* is expressed in regions of the mouse brain other than the neocortex (developingmouse.brain-map.org/), in human, HOPX has been identified as a bRGC marker in the developing neocortex at advanced stages of neurogenesis (Pollen et al., 2015; Thomsen et al., 2016). In light of these data, we searched previous transcriptome datasets of mouse E14.5 latNcx germinal zones (Fietz et al., 2012) and isolated progenitor subpopulations (Florio et al., 2015), and found *Hopx* mRNA expression in the VZ and aRGCs, but not in the SVZ and bRGCs,

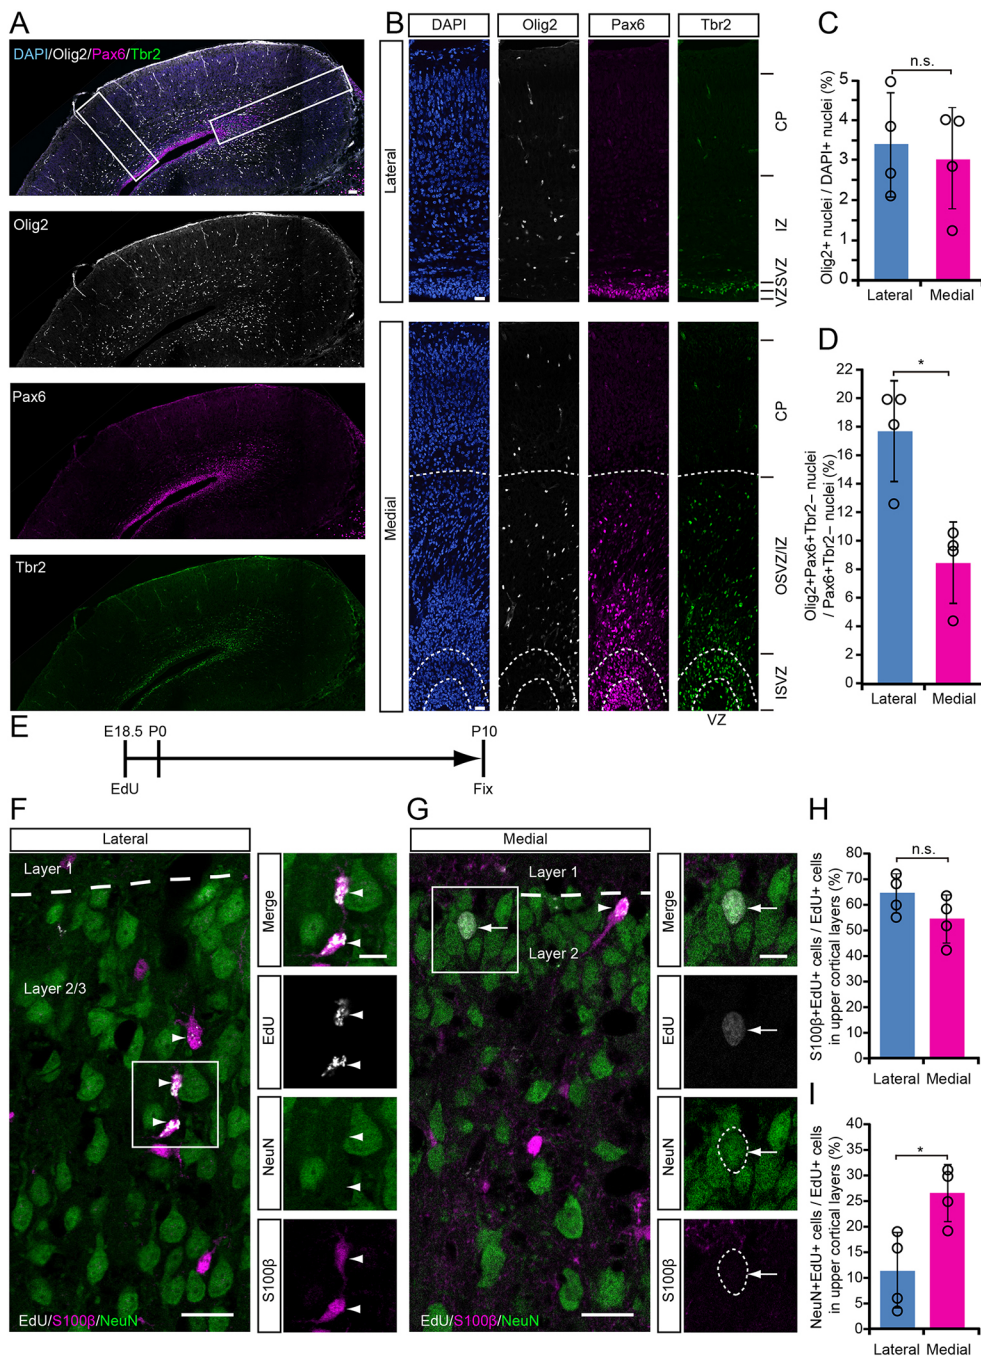

**Fig. 3. Progenitor cells in mouse E18.5 medNcx contain a lesser proportion of gliogenic and a larger proportion of neurogenic precursors than latNcx.** (A–D) A lesser proportion of the Pax6<sup>+</sup>Tbr2<sup>-</sup> cells in medNcx than latNcx expresses Olig2. (A,B) Olig2 (white), Pax6 (magenta) and Tbr2 (green) triple immunofluorescence, combined with DAPI staining (blue). White boxes in A indicate areas shown at higher magnification in B (top, latNcx; bottom, medNcx). (C) Quantification of the percentage of DAPI-positive nuclei that are Olig2<sup>+</sup> in latNcx (blue) and medNcx (magenta) (20 μm wide field). (D) Quantification of the percentage of Pax6<sup>+</sup>Tbr2<sup>-</sup> cells that are Olig2<sup>+</sup> in the latNcx (blue) and medNcx (magenta). (E–I) A larger proportion of the progenitor cells giving rise to the upper cortical layers are neurogenic in medNcx than in latNcx. Mice were labeled by an EdU pulse at E18.5 and analysed at P10 (see E). (F,G) EdU (white), NeuN (green) and S100β (magenta) triple immunofluorescence of cortical layers 2 and 3 [area within 200 μm of the boundary between layers 1 and 2 (dashed lines)] of P10 latNcx (F) and medNcx (G). White boxes indicate areas shown at higher magnification in the respective right panels. Arrowheads indicate S100β<sup>+</sup>EdU<sup>+</sup> cells; arrows and dashed circles indicate NeuN<sup>+</sup>EdU<sup>+</sup> cells. (H) Quantification of the percentage of EdU<sup>+</sup> cells that are S100β<sup>+</sup> in the lateral (blue) and medial (magenta) upper cortical layers. (I) Quantification of the percentage of EdU<sup>+</sup> cells that are NeuN<sup>+</sup> in the lateral (blue) and medial (magenta) upper cortical layers. (C,D,H,I) Error bars indicate s.d.; n.s., not statistically significant; \**P*<0.05. Student's *t*-test in C (*n*=4 embryos), D (*n*=4 embryos), H (*n*=4 mice) and I (*n*=4 mice). Open circles in C, D,H,I represent individual data points. (A, B,F,G) Images are single 0.4–0.6 μm optical sections. Scale bars: 50 μm in A; 20 μm in B and left panels in F,G; 10 μm in right panels in F,G.

of latNcx (data not shown), consistent with the absence of an OSVZ-like structure in this cortical region. However, given the presence of an OSVZ-like structure and of Hopx mRNA in the mouse E18.5 medNcx, we investigated whether the Hopx protein is expressed in this cortical region.

Consistent with previous Hopx mRNA *in situ* hybridisation data (Muhlriedel et al., 2005, 2007), immunoreactivity for the Hopx protein was detected in the mouse E18.5 medNcx (Fig. 4A,C,F,G), but not latNcx (Fig. 4A,B,D,E), both in rostral (Fig. 4A,C) and caudal (Fig. 4A,F,G) areas. Importantly, the Hopx protein was detected not only in the VZ, but also in the ISVZ and OSVZ (Fig. 4G). This pattern of Hopx immunoreactivity was observed with both a rabbit polyclonal antibody (Fig. S2A–C) and a mouse monoclonal antibody (Fig. 4A,C,F,G). Although the latter antibody,

in contrast to the rabbit polyclonal antibody, yielded nonspecific staining of blood vessels (Fig. 4A), it was nonetheless used in order to compare the immunostaining for Hopx with that of Pax6 (rabbit polyclonal antibody) and Tbr2 (chicken polyclonal antibody) (Fig. 4C,F,G). (For the analysis of Hopx protein expression during earlier stages of mouse embryonic development and during early postnatal stages, and to compare the similarity between Hopx expression in developing mouse medNcx and the human foetal neocortex, see Figs S2 and S3.)

### Most proliferating bRGCs in E18.5 medNcx express the Hopx protein

The abundance of the Hopx<sup>+</sup> cells in the E18.5 medNcx decreased from the VZ to the ISVZ to the OSVZ (Fig. 4H). Given the similar

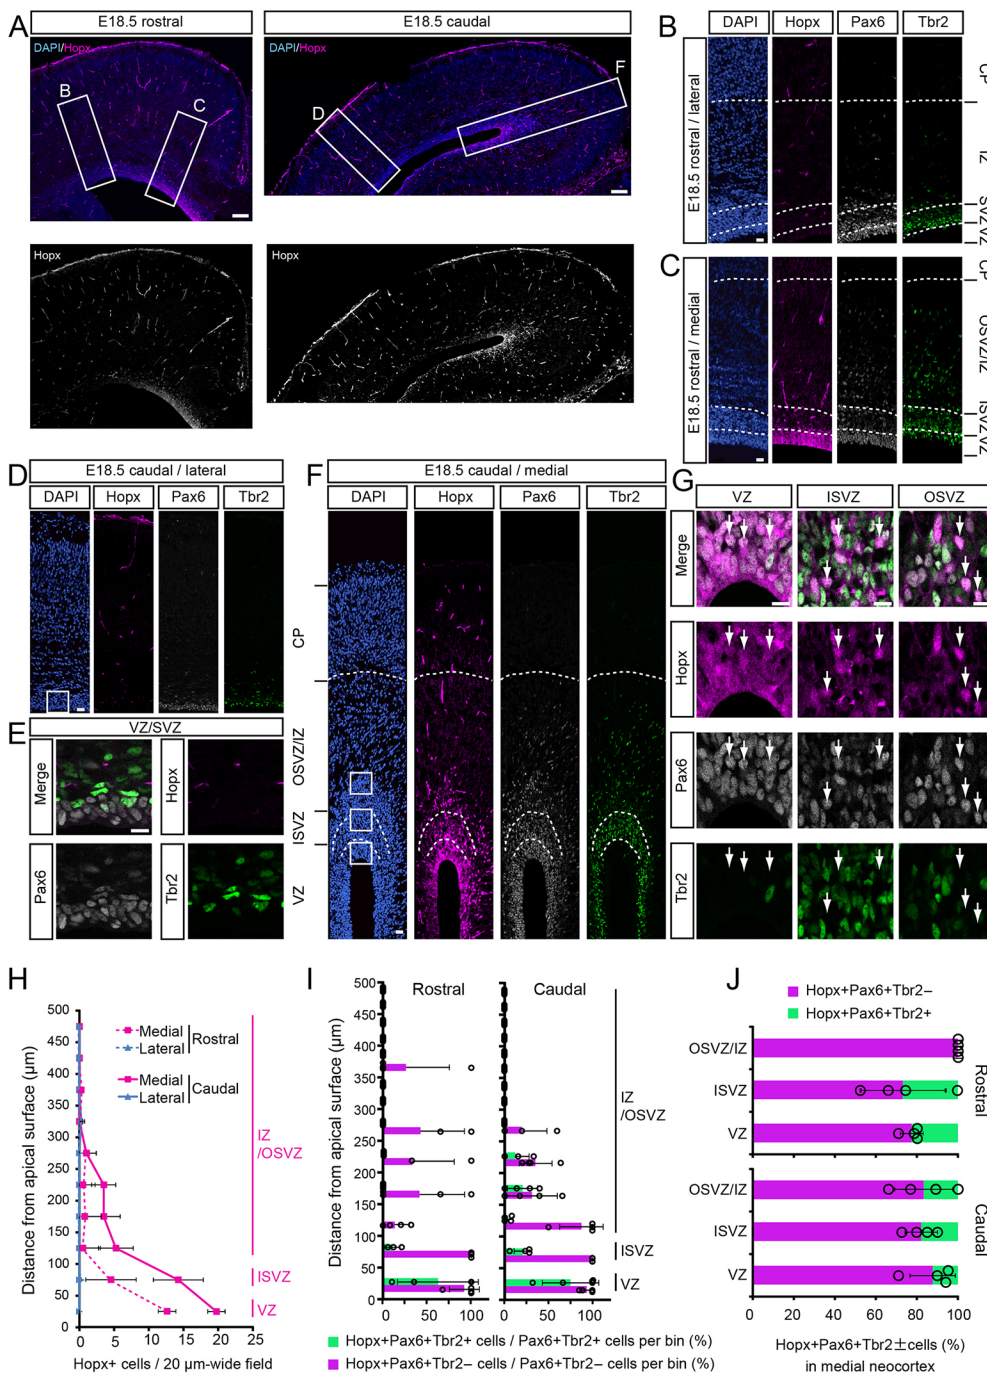

**Fig. 4. Hopx protein is specifically expressed in the mouse E18.5 medNcx.** (A) Hopx (magenta, white) immunofluorescence, combined with DAPI staining (blue, top images). (B,C) Hopx (magenta), Pax6 (white) and Tbr2 (green) triple immunofluorescence combined with DAPI staining (blue). (D-G) Hopx (magenta), Pax6 (white) and Tbr2 (green) triple immunofluorescence combined with DAPI staining (blue, D,F). White box in D indicates area shown at higher magnification in E; white boxes in F indicate VZ (apical box), ISVZ (middle box) and OSVZ (basal box) shown at higher magnification in G. Arrows in G indicate Hopx<sup>+</sup>Pax6<sup>+</sup>Tbr2<sup>-</sup> cells. (H) Quantification of the distribution of Hopx<sup>+</sup> cells along a 500 μm radial axis (divided into 10 bins) of rostral latNcx (dashed blue line), rostral medNcx (dashed magenta line), caudal latNcx (solid blue line) and caudal medNcx (solid magenta line). (I) Quantification of the percentage per bin of Pax6<sup>+</sup>Tbr2<sup>-</sup> (magenta) and Pax6<sup>+</sup>Tbr2<sup>+</sup> (green) cells that are Hopx<sup>+</sup> along a 500 μm radial axis (divided into 10 bins) of rostral (left plot) and caudal (right plot) medNcx (20 μm wide field). (J) Quantification of the percentages of Hopx<sup>+</sup> cells that are Pax6<sup>+</sup>Tbr2<sup>-</sup> (green) and Pax6<sup>+</sup>Tbr2<sup>+</sup> (magenta) in the indicated zones of rostral and caudal medNcx. (H-J) Error bars indicate s.d. Open circles in I,J represent individual data points ( $n=4$  embryos). (A-G) Images in A are 11 μm merged stacks; images in B-G are single 0.6 μm optical sections. Scale bars: 50 μm in A; 20 μm in B-D,F and 10 μm in E,G.

pattern of abundance of the Pax6<sup>+</sup>Tbr2<sup>-</sup> and Pax6<sup>+</sup>Tbr2<sup>+</sup> cells in the E18.5 medNcx (Fig. 1), it was of interest to relate the Hopx expression to that of Pax6 and Tbr2 at the cellular level. Most of the Pax6<sup>+</sup>Tbr2<sup>-</sup> cells in the VZ, ISVZ and apical-most region of the OSVZ were found to be Hopx<sup>+</sup>, whereas only Pax6<sup>+</sup>Tbr2<sup>+</sup> cells in the VZ showed Hopx immunoreactivity in the majority of cases (Fig. 4I). With regard to the bRGCs in the E18.5 medNcx, these data are consistent with the notion that Hopx expression occurs preferentially in proliferating bRGCs. In line with this notion, all Hopx<sup>+</sup> cells in the E18.5 medNcx germinal zones were Pax6<sup>+</sup> (Fig. 4J), and the vast majority of these Hopx<sup>+</sup> cells were Tbr2<sup>-</sup> (Fig. 4J) and Sox2<sup>+</sup> (Fig. S2E). Moreover, >80% of the basal mitoses in the E18.5 medNcx, as identified by pVim immunofluorescence, were Hopx<sup>+</sup> (Fig. S2D).

Taken together, these results show that, in contrast to the latNcx of the embryonic mouse, the mouse E18.5 medNcx exhibits key features also observed in the development of an expanded neocortex, as characterized in foetal human (Fietz et al., 2010; Hansen et al., 2010; Pollen et al., 2015; Nowakowski et al., 2016; Thomsen et al., 2016), foetal macaque (Smart et al., 2002; Betizeau et al., 2013) and embryonic ferret (Fietz et al., 2010; Reillo et al., 2011) (Fig. S2F) neocortex. These features notably include the existence of an OSVZ that contains proliferating Pax6<sup>+</sup> bRGCs extending a basal process and expressing the Hopx protein, a bRGC marker in the OSVZ at advanced stages of foetal human neocortical neurogenesis (Pollen et al., 2015; Nowakowski et al., 2016; Thomsen et al., 2016).

### The bRGCs in embryonic mouse medNcx exhibit a human bRGC-like gene expression signature

To directly analyze whether the bRGCs in the embryonic mouse medNcx are distinct from the bRGCs in the embryonic mouse latNcx and, perhaps, are more related to the bRGCs in foetal human neocortex than the mouse lateral bRGCs, we took advantage of population-level RNA-sequencing of bRGCs isolated from E18.5 mouse medNcx. We first compared the gene expression of these bRGCs with that of various cortical progenitor populations previously isolated from E14.5 mouse latNcx (Florio et al., 2015). Using principal component analysis (PCA), we found that mouse medial bRGCs emerge as a distinct progenitor population that can be clearly distinguished from mouse lateral bRGCs, aRGCs and bIPs (Fig. 5A). We extended this analysis by performing PCA of mouse medial bRGCs and all cell populations previously isolated from embryonic mouse and foetal human neocortex (Florio et al., 2015), which, in addition to the cortical progenitor populations already analyzed (Fig. 5A), included *Tis21*-GFP-negative and

-positive mouse lateral aRGCs, mouse neurons, GW15 human aRGCs, human bRGCs and a fraction enriched in human neurons (see Fig. S4).

To examine whether the mouse medial bRGCs exhibit human bRGC-like gene expression, we next analyzed and compared the expression levels of the previously identified 64 human bRGC-enriched genes (Pollen et al., 2015) or their mouse orthologs among the bRGCs isolated from E14.5 latNcx (Florio et al., 2015), E18.5 medNcx (present study) and human GW15 neocortex (Florio et al., 2015). As shown in Fig. 5B, a greater *Hopx* mRNA level was detected in the mouse medial bRGCs than the mouse lateral bRGCs, consistent with the present immunohistochemical results (Fig. S2A). We further found that for the overwhelming majority of the 64 human bRGC-enriched genes or their respective mouse orthologs, the expression levels in the mouse medial bRGCs were higher than in the mouse lateral bRGCs, and in many cases (e.g. *Gfap*, *Dio2*, *Bmp7*, *Fabp7*, *Ptprz1*, *Tnc*, *Veph1* and *Etv1*) approached or even exceeded those in the human bRGCs

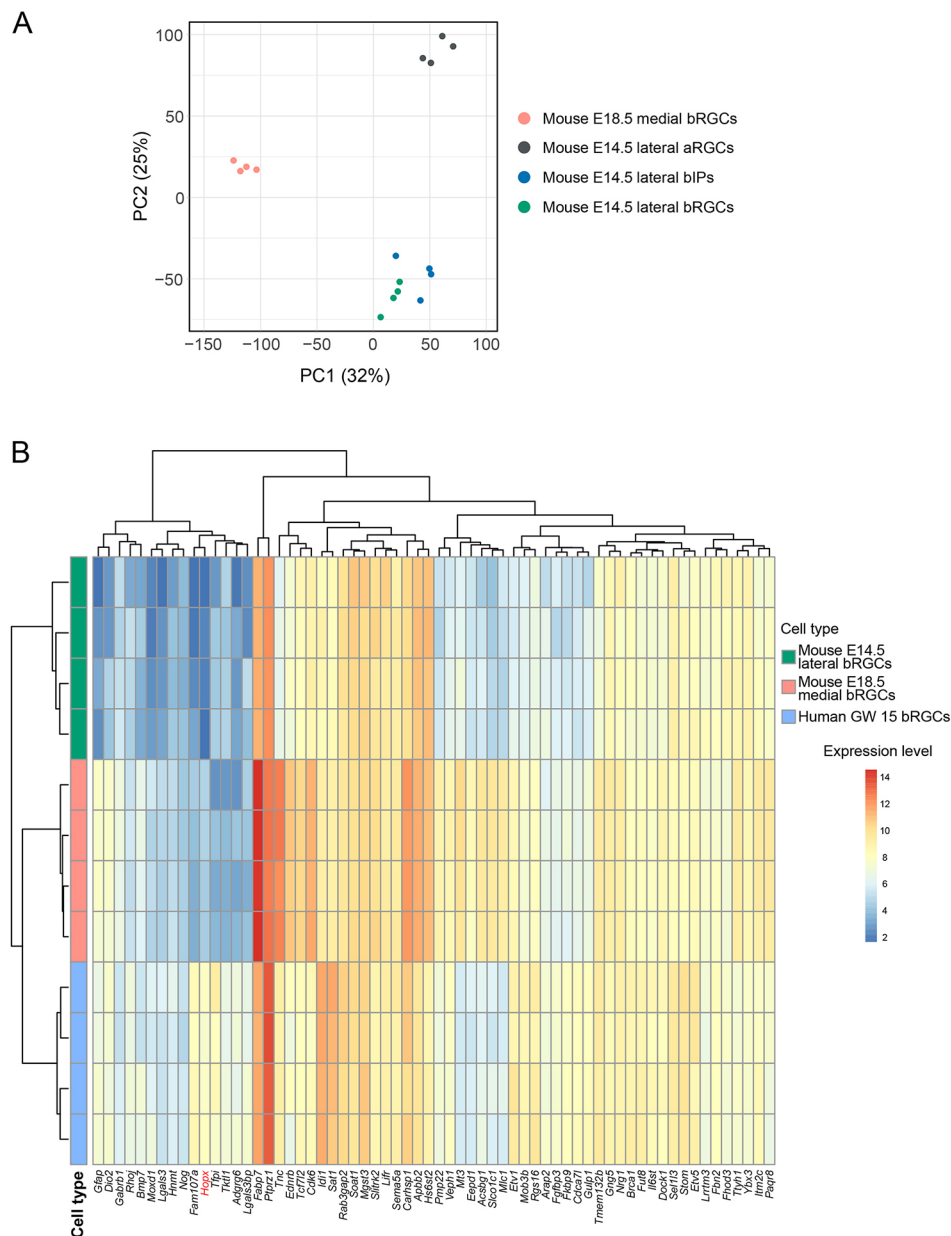

**Fig. 5. bRGCs in mouse E18.5 medNcx exhibit a gene expression distinct from aRGCs, bRGCs and bIPs in mouse E14.5 latNcx, and express a human bRGC-like gene signature.** Comparative analysis of RNA-seq data of: (1) bRGCs isolated from mouse E18.5 medNcx (this study; A,B); (2) cortical progenitor populations isolated from mouse E14.5 latNcx (Florio et al., 2015; GEO accession number GSE65000; A,B); and (3) bRGCs isolated from human GW 15 neocortex [(Florio et al., 2015), GSE65000; B]. (A) Principal component analysis of rlog-transformed counts. First and second principal component (PC1 and PC2) of mouse cortical progenitor samples (four replicates per indicated mouse cortical progenitor type, colored dots) are shown along with the proportion of variance explained. (B) Clusters heatmap of mouse medial (pink), mouse lateral (green) and human (blue) bRGC populations based on rlog-transformed counts of the 64 human bRGC-enriched genes and their mouse orthologs. Horizontal rows (replicates of each of the three bRGC populations) and vertical columns (genes) were hierarchically clustered using complete linkage and Euclidian distance.

(Fig. 5B). In fact, hierarchical clustering indicated that the mouse medial bRGCs were more closely related to human bRGCs than the mouse lateral bRGCs. These results indicate that the mouse medial bRGCs exhibit a human bRGC-like gene expression signature. These data were complemented by unbiased single-cell transcriptomics (see Fig. S5) and by an analysis of the expression levels of the orthologs of the 64 human bRGC-enriched genes (Pollen et al., 2015) in the OSVZ of a prospective gyrus versus a prospective sulcus of developing ferret neocortex (De Juan Romero et al., 2015) (see Fig. S6).

### Disruption of *Hopx* expression in the embryonic mouse medNcx reduces the abundance of bRGCs

We investigated a potential functional role of *Hopx* in the bRGCs of the mouse embryonic medNcx SVZ, using CRISPR/Cas9-mediated gene disruption (for details, see Fig. S7). Analysis of the proportion of *Hopx*<sup>+</sup> cells among the RFP<sup>+</sup> cells in the VZ and SVZ revealed that CRISPR/Cas9-mediated disruption of *Hopx* gene expression almost completely abolished the occurrence of *Hopx*<sup>+</sup> cells among the progeny of the targeted cells found in the VZ, and completely did so for the SVZ (Fig. 6A,B).

Such a disruption of *Hopx* expression in the embryonic mouse medNcx did not affect the abundance of the Sox2<sup>+</sup>Tbr2<sup>+</sup>RFP<sup>+</sup> cells and the Sox2<sup>+</sup>Tbr2<sup>-</sup>RFP<sup>+</sup> cells in the VZ but reduced the abundance of the Sox2<sup>+</sup>Tbr2<sup>-</sup>RFP<sup>+</sup> cells in the SVZ about twofold (Fig. 6C-G). This decrease in Sox2<sup>+</sup>Tbr2<sup>-</sup>RFP<sup>+</sup> cells in the SVZ was accompanied by a significant increase in the number of Sox2<sup>-</sup>Tbr2<sup>+</sup>RFP<sup>+</sup> cells. The decrease in the Sox2<sup>+</sup>Tbr2<sup>-</sup>RFP<sup>+</sup> SVZ cells was observed irrespective of whether the quantification was performed per total RFP<sup>+</sup> SVZ cells (Fig. 6F) or per SVZ area (Fig. 6G), eliminating the possibility that it reflected differences in the efficiency of *in utero* electroporation. Furthermore, disruption of *Hopx* expression markedly reduced the abundance of basal Sox2<sup>+</sup>RFP<sup>+</sup> cells in mitosis, as revealed by pVim immunofluorescence (Fig. 6H-J), and of total BPs in mitosis, as revealed by immunofluorescence for phosphorylated histone H3 (PH3) (Fig. S7G-I). The proportion of the Sox2<sup>+</sup>RFP<sup>+</sup> mitotic BPs that exhibited a basal process at mitosis did not differ between control and *Hopx* gene disruption (Fig. 6K). These results demonstrate that *Hopx* is required to maintain the level of Sox2<sup>+</sup> progenitors in the SVZ of embryonic mouse medNcx, with the majority of these progenitors presumably being bRGCs (see Fig. 2L, Fig. 4J). (For the analysis of the potential consequence for neurogenesis of the reduced abundance of Sox2<sup>+</sup> SVZ progenitors in embryonic mouse medNcx upon disruption of *Hopx* expression, see Fig. S8.)

### Forced expression of *Hopx* in the embryonic mouse latNcx increases the abundance of bRGCs

Only a minor proportion of the progenitors residing in the SVZ of mouse E18.5 latNcx are bRGCs (Shitamukai et al., 2011; Wang et al., 2011; Wong et al., 2015) (Fig. 1B,F,H, Fig. 2K,L). As the expression of the *Hopx* protein in the latNcx decreases from E15.5 to E18.5 and is lacking at the latter stage (Fig. S2A), and given the essential role of *Hopx* in maintaining the level of bRGCs in the SVZ of embryonic mouse medNcx (Fig. 6F,G,J), we explored whether forced *Hopx* expression in the embryonic mouse latNcx would increase bRGC abundance.

To achieve this, we expressed *Hopx* under the control of a constitutive promoter, along with a GFP reporter, in the latNcx by *in utero* electroporation at E15.5, and analyzed the abundance and distribution of progenitor cells at E18.5 (Fig. 7A,B). The presence of the *Hopx* protein in the progeny of the electroporated cells was confirmed by immunofluorescence (Fig. S9). Analysis of the

progeny of the electroporated cells by immunofluorescence for pVim showed that this forced *Hopx* expression did not significantly alter the level of APs undergoing mitosis (Fig. 7C). In contrast, forced *Hopx* expression tripled the level of mitotic BPs in the latNcx that were derived from the electroporated cells (Fig. 7D). This increase in BPs included an increase in basally located Pax6<sup>+</sup> cells, which were observed not only in the SVZ but, notably, also in the IZ (Fig. 7E). Moreover, the proportion of the Pax6<sup>+</sup>GFP<sup>+</sup> BPs that exhibited a basal process at mitosis (Fig. 7H) was threefold greater upon forced *Hopx* expression than in the control (Fig. 7I). When the GFP<sup>+</sup> cells in the VZ were analyzed for Tbr2 expression, the proportion of the Pax6<sup>+</sup>Tbr2<sup>-</sup> cells and the Pax6<sup>+</sup>Tbr2<sup>+</sup> cells was not changed upon forced *Hopx* expression (Fig. 7F). In contrast, analysis of the GFP<sup>+</sup> cells in the SVZ-IZ revealed: (1) a marked increase in the proportion of Pax6<sup>+</sup>Tbr2<sup>-</sup> cells; (2) an increase (albeit not statistically significant) in the proportion of Pax6<sup>+</sup>Tbr2<sup>+</sup> cells; and (3) no change in the proportion of Pax6<sup>-</sup>Tbr2<sup>+</sup> cells (Fig. 7G). Together, these results demonstrate that forced *Hopx* expression in the embryonic mouse latNcx does not affect AP abundance but is sufficient to increase the abundance of BPs and promotes the generation of bRGCs among these BPs (please see Discussion for the issue of cortical folding). (For the analysis of the potential effects on neurogenesis of the increased bRGC abundance in the embryonic mouse latNcx caused upon forced *Hopx* expression, see Fig. S10.)

## DISCUSSION

The present study provides two advances with regard to our insight into the development of the cerebral cortex. First, we identify a region in the embryonic mouse neocortex – the medNcx – that exhibits a bRGC/BP proportion as high as that typically found in a developing gyrencephalic neocortex. Second, we demonstrate that the mouse ortholog of a marker of human bRGCs, *Hopx*, is necessary and sufficient for such a high bRGC/BP proportion. These findings may have implications for the evolution of the lissencephalic mouse neocortex.

### *Hopx* – a determinant of bRGC abundance

Our data indicate that *Hopx* is necessary and sufficient to achieve an abundance of bRGCs that is essentially as high as that typically observed in a developing gyrencephalic neocortex (e.g. human; Fietz et al., 2010). Specifically, CRISPR/Cas9-mediated disruption of *Hopx* expression in the embryonic mouse medNcx reduced the relative abundance of bRGCs from ~50% of all BPs (see Fig. 2K) to a level essentially as low as that seen in embryonic mouse latNcx [at most 20% of all BPs (Shitamukai et al., 2011; Wang et al., 2011; Wong et al., 2015); Fig. 2K] (Fig. 6F,G,J). Conversely, forced *Hopx* expression in the embryonic mouse latNcx increased the relative abundance of bRGCs to the level seen in the mouse E18.5 medNcx (Fig. 7D-F). The present data therefore establish *Hopx* as a key determinant of bRGC abundance in the developing neocortex.

Further studies will be required to determine whether an increase in bRGC abundance due to *Hopx* expression can promote neocortical folding, as has been observed previously upon forced expression in embryonic mouse neocortex of ARHGAP11B (Florio et al., 2015) and sonic hedgehog (Wang et al., 2016), or upon knockdown of *Trnp1* (Stahl et al., 2013). On the one hand, we did not observe neocortical folding upon forced *Hopx* expression in embryonic mouse latNcx by P1 (Fig. S10A and data not shown). Moreover, we found abundant *Hopx*<sup>+</sup> cells in the OSVZ of the latNcx of embryonic marmoset (data not shown), a near-lissencephalic primate. On the other hand, we noticed upon data



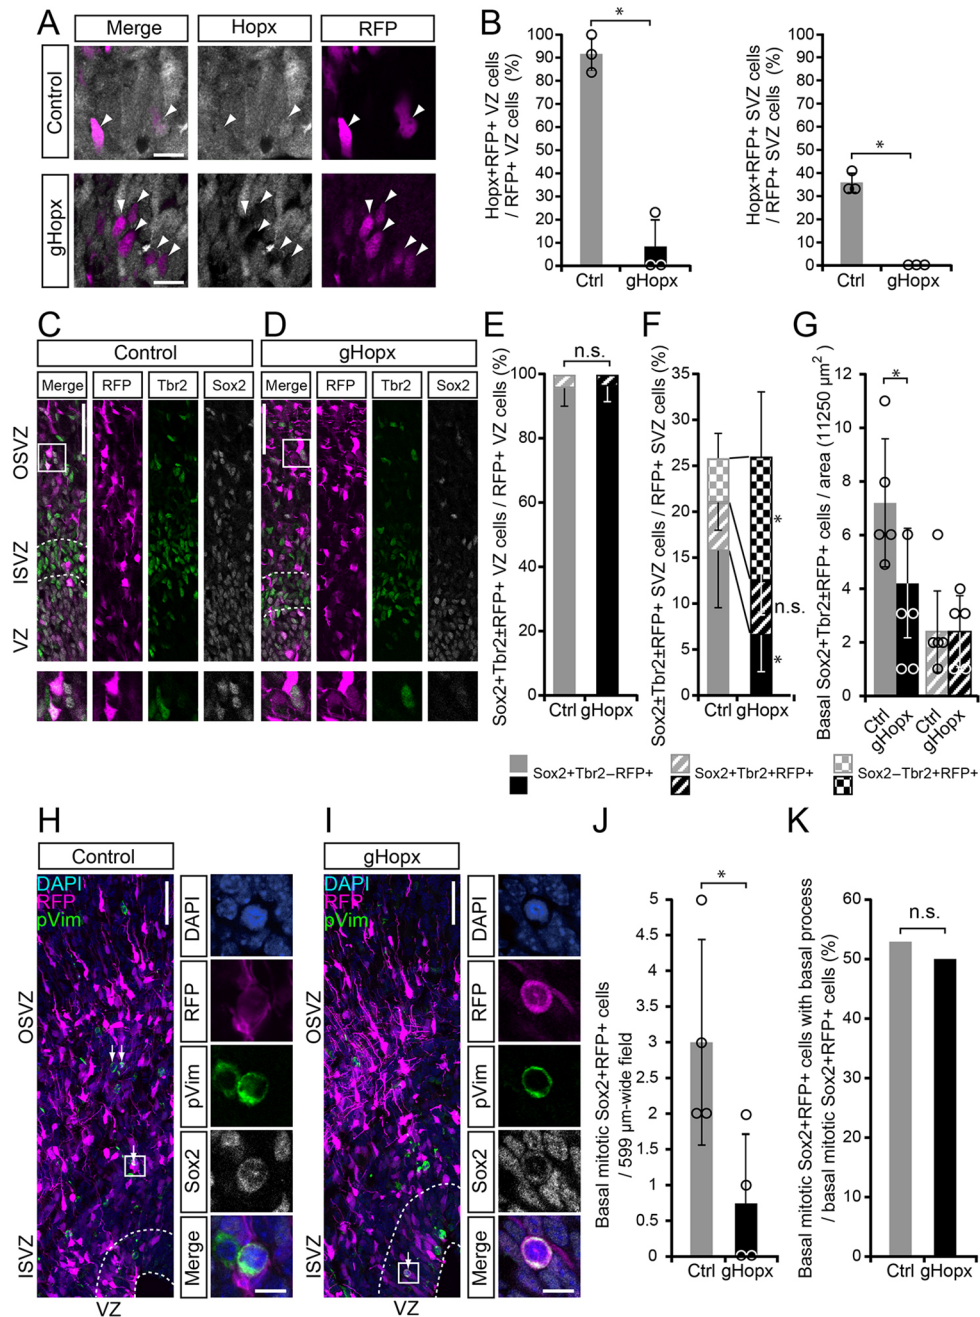

**Fig. 6. CRISPR/Cas9-mediated disruption of Hopx expression in embryonic mouse medNcx decreases cycling bRGCs.** MedNcx of mouse E15.5 embryos was *in utero* electroporated with either a plasmid encoding Cas9\_T2A\_PaprikaRFP and a gRNA targeting *LacZ* (control, Ctrl), or with a mixture of two plasmids, each encoding Cas9\_T2A\_PaprikaRFP and one of the two gRNAs targeting *Hopx* (gHopx, either gRNA #10 or gRNA #13, see Fig. S7), all under constitutive promoters, followed by analysis at E18.5. (A) RFP (magenta) and Hopx (white) double immunofluorescence of the VZ. Arrowheads indicate RFP<sup>+</sup> cells; note the presence of Hopx immunoreactivity in the control RFP<sup>+</sup> cells (top) and its absence in the RFP<sup>+</sup> cells upon gHopx electroporation (bottom). (B) Quantification of the proportion of RFP<sup>+</sup> cells in the VZ (left) and SVZ (right) that are Hopx<sup>+</sup> upon control (gray) and gHopx (black) electroporation. (C, D) RFP (magenta), Tbr2 (green) and Sox2 (white) triple immunofluorescence, upon control (C) and gHopx (D) electroporation. White boxes in left panels indicate areas shown at higher magnification in the respective bottom panels. (E) Quantification of percentage of RFP<sup>+</sup> cells in VZ that are Sox2<sup>+</sup>Tbr2<sup>-</sup> (solid) and Sox2<sup>+</sup>Tbr2<sup>+</sup> (stripe) upon control (gray) and gHopx (black) electroporation. (F) Quantification of percentage of RFP<sup>+</sup> cells in SVZ that are Sox2<sup>+</sup>Tbr2<sup>-</sup> (solid), Sox2<sup>+</sup>Tbr2<sup>+</sup> (stripe) and Sox2<sup>-</sup>Tbr2<sup>+</sup> (checked) upon control (gray) and gHopx (black) electroporation. (G) Quantification of basal RFP<sup>+</sup> cells in ISVZ plus OSVZ (11,250 μm<sup>2</sup> area) that are Sox2<sup>+</sup>Tbr2<sup>-</sup> (solid) and Sox2<sup>+</sup>Tbr2<sup>+</sup> (stripe) upon control (gray) and gHopx (black) electroporation. (H, I) RFP (magenta), pVim (green) and Sox2 (white) triple immunofluorescence, combined with DAPI staining (blue), upon control (H) and gHopx (I) electroporation. White boxes in left panels indicate areas shown at higher magnification in the respective right panels. Arrows indicate basal RFP<sup>+</sup> cells in mitosis, as revealed by pVim immunofluorescence. (J) Quantification of basal Sox2<sup>+</sup>pVim<sup>+</sup>RFP<sup>+</sup> cells upon control (gray) and gHopx (black) electroporation. (K) Quantification of percentage of basal Sox2<sup>+</sup>pVim<sup>+</sup>RFP<sup>+</sup> cells that retain a basal process upon control (gray) and gHopx (black) electroporation. (B, E-G, J) Error bars indicate s.d.; n.s., not statistically significant; \**P*<0.05. Mann-Whitney's *U*-test in B (*n*=3 embryos), J (*n*=4 embryos) and K (*n*=17 cells for control, 20 cells for gHopx); Student's *t*-test in E (*n*=4 embryos), F (*n*=4 embryos) and G (*n*=4 embryos). Open circles in bar graphs in B, G, J represent individual data points. (A, C, D, H, I) Images in A, C, D and in right panels in H, I are single 0.6 μm optical sections; images in left panels in H, I are 6 μm merged stacks. Scale bars: 50 μm in C, D and left panels in H, I; 10 μm in A and right panels in H, I.

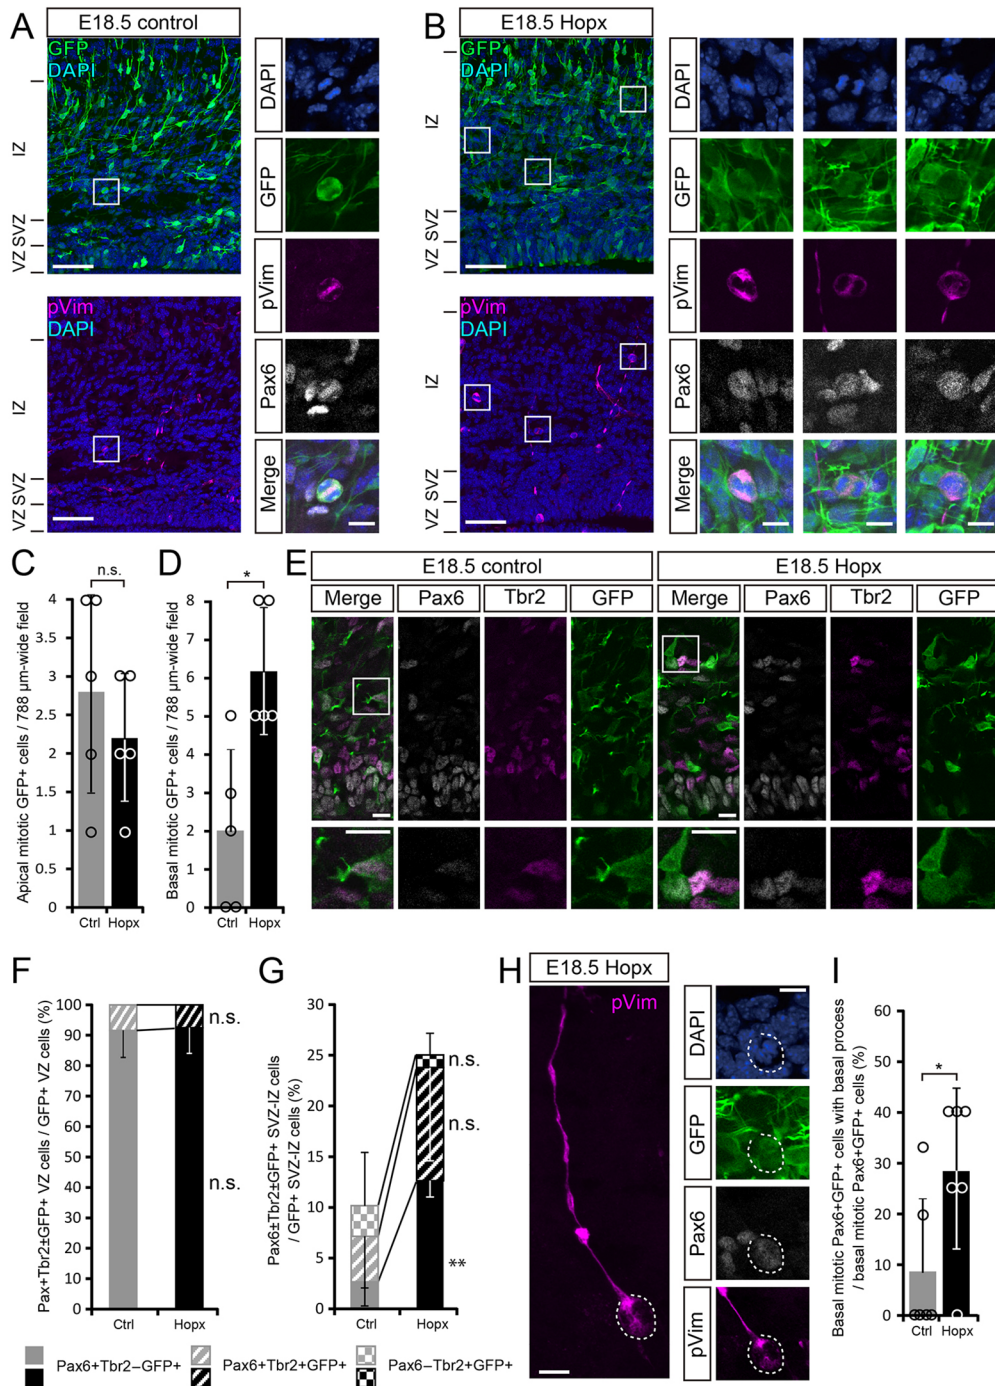

**Fig. 7. Forced Hopx expression in embryonic mouse latNcx increases bRGCs.** LatNcx of mouse E18.5 embryos was *in utero* co-electroporated with a plasmid encoding GFP together with either an empty vector (control, Ctrl) or a Hopx expression plasmid (Hopx) under constitutive promoters, followed by analysis at E18.5. (A,B) GFP (green), pVim (magenta) and Pax6 (white) triple immunofluorescence, combined with DAPI staining (blue), upon control (A) and forced Hopx expression (B). White boxes in left panels indicate areas shown at higher magnification in the respective right panels. (C,D) Quantification of apical (C) and basal (D) GFP<sup>+</sup> cells in mitosis (as revealed by pVim immunofluorescence) in control (gray) and upon forced Hopx expression (black). (E) GFP (green), Tbr2 (magenta) and Pax6 (white) triple immunofluorescence in control and upon forced Hopx expression. White boxes in left panels indicate areas shown at higher magnification in the respective bottom panels. (F) Quantification of percentage of GFP<sup>+</sup> cells in VZ that are Pax6<sup>+</sup>Tbr2<sup>-</sup> (solid) and Pax6<sup>+</sup>Tbr2<sup>+</sup> (stripe) in control (gray) and upon forced Hopx expression (black). (G) Quantification of percentage of GFP<sup>+</sup> cells in a region spanning the basal part of the SVZ and the adjacent part of the IZ (100  $\mu\text{m} \times 100 \mu\text{m}$  field with its basal boundary 200  $\mu\text{m}$  away from the apical surface) that are Pax6<sup>+</sup>Tbr2<sup>-</sup> (solid), Pax6<sup>+</sup>Tbr2<sup>+</sup> (stripe) and Pax6<sup>-</sup>Tbr2<sup>+</sup> (checked) in control (gray) and upon forced Hopx expression (black). (H) Example of a bRGC (Pax6<sup>+</sup>, white) with basal process in mitosis (DAPI, blue; pVim<sup>+</sup>, magenta) upon forced Hopx expression (GFP<sup>+</sup>); dashed circles indicate the cell body. (I) Quantification of percentage of basal Pax6<sup>+</sup>GFP<sup>+</sup> cells in mitosis (pVim<sup>+</sup>) that retain a basal process in control (gray) and upon forced Hopx expression (black). (C,D,F,G,I) Error bars indicate s.d.; n.s., not statistically significant; \* $P < 0.05$ ; \*\* $P < 0.01$ . Student's *t*-test in C ( $n = 5$  embryos), F ( $n = 3$  embryos) and G ( $n = 3$  embryos); Mann-Whitney's *U*-test in D ( $n = 5$  embryos) and I ( $n = 6$  embryos). Open circles in C,D represent individual data points. (A,B,E,H) Images in left panels in A,B,H are 5–6  $\mu\text{m}$  merged stacks; images in right panels in A,B,H and in E are single 0.6  $\mu\text{m}$  optical sections. Scale bars: 50  $\mu\text{m}$  in A,B (left panels); 10  $\mu\text{m}$  in A,B (right panels) and E,H.

mining of the genes differentially expressed in the developing neocortex of the ferret (De Juan Romero et al., 2015), a gyrencephalic carnivore, that *Hopx* expression is higher in the OSVZ of a prospective gyrus than a prospective sulcus (Fig. S6), consistent with a greater bRGC abundance in the former (Reillo et al., 2011; Borrell and Götz, 2014). Our data therefore suggest that the primary function of *Hopx* is related to bRGC abundance, but do not exclude the possibility that an increased bRGC abundance due to *Hopx* expression, in concert with the effects of other factors, may promote neocortical folding.

bRGC abundance is determined by two principal processes: (1) the production of bRGCs from aRGCs; and (2) the self-expansion of bRGCs by symmetric proliferative divisions (Lui et al., 2011; Dehay et al., 2015; Fernandez et al., 2016; Namba and Huttner, 2017). In the developing ferret neocortex, bRGC self-expansion has been shown to largely occur after a defined time window of bRGC production from aRGCs (Martinez-Martinez et al., 2016). How, then, can the presence of *Hopx* protein in both aRGCs and bRGCs of mouse E18.5 medNcx be interpreted? First, the presence of *Hopx* in the medial aRGCs may be indicative of a role in bRGC production, rather than in aRGC self-expansion. Support for the latter scenario being unlikely is provided by our findings that disruption of *Hopx* expression in the medial aRGCs did not decrease their pool size (Fig. 6E), and forced *Hopx* expression in the lateral aRGCs did not increase their pool size (Fig. 7C). Second, the presence of *Hopx* in the medial bRGCs likely suggests that it promotes bRGC self-expansion. The marked decrease in bRGC abundance (Fig. 6F,G,J), without a concomitant increase in aRGC abundance (Fig. 6E), upon disruption of *Hopx* expression in the mouse embryonic medNcx supports this view.

### The embryonic mouse medNcx – a relict of an ancestral gyrencephalic developing cerebral cortex?

The present finding that the embryonic mouse medNcx, in contrast to the latNcx, exhibits an OSVZ-like germinal zone with abundant bRGCs may have implications for the evolution of the lissencephalic mouse neocortex. It has previously been proposed that all mammals evolved from a common gyrencephalic ancestor (O'Leary et al., 2013; Lewitus et al., 2014) and that the mouse lissencephaly is secondary in nature, reflecting phyletic dwarfing (Kelava et al., 2013; Lewitus et al., 2014). If so, one would expect to find any relicts of this gyrencephalic ancestor in the developing medNcx rather than latNcx, as the former constitutes an evolutionarily older part of the neocortex than the latter (Sanides, 1969). The OSVZ-like germinal zone with abundant bRGCs, which is a typical feature of a developing gyrencephalic neocortex and that we observed in the embryonic mouse medNcx, would be consistent with this scenario. This notion is not contradicted by the previous finding that the embryonic neocortex of the common marmoset also exhibits an OSVZ-like germinal zone with abundant bRGCs, as the marmoset has also been proposed to have evolved from a gyrencephalic ancestor (Kelava et al., 2013); OSVZ and abundant bRGCs may also be relicts of this ancestor.

In this context, two previous observations should be noted. First, the gyrification of the mouse neocortex that could be induced by an activation of the sonic hedgehog signaling pathway during embryonic corticogenesis was found to primarily take place in the cingulate cortex (Wang et al., 2016), which belongs to the medNcx. As the specific approach taken by the authors resulted in activation of the sonic hedgehog signaling pathway not only in the embryonic mouse medNcx but also the adjacent latNcx (Wang et al., 2016), this finding suggests that the medNcx of embryonic mouse, specifically,

may be particularly 'gyrification-prone', as would be expected if it retains features of an ancestral gyrencephalic neocortex.

Second, gyrification is a characteristic feature of the hippocampus (i.e. the dentate gyrus) in most mammals but not in birds and reptiles. In fact, there may be a parallel with regard to the evolution of cortical folding between the mammalian dentate gyrus, which arises from the medial cerebral cortex, and the mouse medNcx, which appears to retain ancestral gyrencephalic features (Hevner, 2016). It is therefore interesting to note that the dentate gyrus also exhibits high expression of *Hopx* during mouse development (Muhlfriedel et al., 2005).

As a corollary of the latNcx being evolutionarily younger than the medNcx, one may expect that as gyrification increases among mammals, it does so to a greater extent in the latNcx than in the medNcx. We explored this possibility by determining the gyrification index (GI) separately for the adult latNcx and medNcx of 20 selected species (Fig. S11A). These 20 species were chosen from the two previously identified principal groups of mammals (10 each), i.e. with a  $GI \leq 1.5$  vs a  $GI > 1.5$  (Lewitus et al., 2014) (see legend to Fig. S11B). Remarkably, plotting the ratio of the neocortical GI (nGI) of adult latNcx/medNcx as a function of overall nGI not only corroborated the existence of these two principal groups of mammals (Fig. S11B) but also revealed that, for either group of mammals, the increase in the nGI among species is typically accompanied by an increase in the ratio of lateral nGI/medial nGI (Fig. S11B). This supports the notion that an increase in gyrification during evolution affected the younger latNcx to a greater extent than the older medNcx.

Finally, the present hypothesis that the progenitor features in the developing mouse medNcx may reflect relicts of the presumptive gyrencephalic ancestor to the mouse was supported by the results of analyzing the gene expression of mouse medial bRGCs in comparison with mouse lateral bRGCs and foetal human bRGCs. This revealed not only that mouse medial bRGCs constitute a cortical progenitor population distinct from mouse lateral bRGCs (Fig. 5A, Fig. S4), but demonstrated that mouse medial bRGCs share many features of their gene expression signature with bRGCs from foetal human neocortex (Fig. 5B). In fact, two genes with high levels of mRNA expression in bRGCs isolated from foetal human neocortex, *FABP7* and *PTPRZ1*, also showed high levels of mRNA expression in bRGCs isolated from embryonic mouse medNcx, in line with these two genes having been implicated in neocortex development and evolution (Pollen et al., 2015). As foetal human bRGCs have been implicated in promoting gyrencephaly (Florio and Huttner, 2014; Fernandez et al., 2016), the latter results are consistent with our hypothesis concerning the evolution of the lissencephalic mouse from a gyrencephalic ancestor.

## MATERIALS AND METHODS

### Mice

C57BL/6J mice were used unless indicated otherwise. *Tubb3*-GFP transgenic mice (Attardo et al., 2008) were used for bRGC isolation by FACS (see below). Mice were maintained in pathogen-free conditions at the animal facility of the Max Planck Institute of Molecular Cell Biology and Genetics (MPI-CBG), Dresden, Germany. All experiments were performed in accordance with German animal welfare legislation and were overseen by the Institutional Animal Welfare Officer. Necessary licenses were obtained from the regional Ethical Commission for Animal Experimentation of Dresden, Germany (Tierversuchskommission, Landesdirektion Dresden).

### Human tissue

Human foetal brain cryosections were from the samples described previously (GW15, corresponding to 13 weeks post-conception)

(Florio et al., 2015). Human foetal brain tissue was obtained from the Klinik und Poliklinik für Frauenheilkunde und Geburtshilfe, Universitätsklinikum Carl Gustav Carus of the Technische Universität Dresden, following elective pregnancy termination and informed written maternal consents, and with approval of the local University Hospital Ethical Review Committees.

### Ferret tissue

Ferret embryonic brain cryosections were from the E36 samples described previously (Turrero Garcia et al., 2016). All experiments were performed in accordance with German animal welfare legislation and were overseen by the Institutional Animal Welfare Officer. Necessary licenses were obtained from the regional Ethical Commission for Animal Experimentation of Dresden, Germany (Tierversuchskommission, Landesdirektion Dresden).

### EdU labeling *in vivo*

For *in vivo* EdU labeling, female mice carrying E18.5 embryos were injected intraperitoneally with 100  $\mu$ l of 1 mg/ml EdU (Sigma) in PBS, or mouse pups at P0 were injected intraperitoneally with 25–30  $\mu$ l of 1 mg/ml EdU (Sigma) in PBS. Pups were perfused 11 days after EdU injection and processed as described below.

### Disruption of *Hopx* expression and forced *Hopx* expression

For disruption of *Hopx* expression and forced *Hopx* expression, *in utero* electroporation was carried out essentially as described previously (Namba et al., 2014). Briefly, pregnant mice carrying E15.5 embryos were anaesthetised using isoflurane. We made use of CRISPR/Cas9-mediated disruption of gene expression in mouse embryonic neocortex (Chen et al., 2015; Kalebic et al., 2016; Shinmyo et al., 2016) and established such disruption for *Hopx* expression. To achieve this, embryos were injected intraventricularly either with pD1321-AP-gLacZ (Kalebic et al., 2016) (2  $\mu$ g/ $\mu$ l) (control condition) or with a mixture of pD1321-AP-g*Hopx* #10 (CAGACGCGCACGGACCATGT, 1  $\mu$ g/ $\mu$ l) plus pD1321-AP-g*Hopx* #13 (GACCCGCTCGGCTGCGATG, 1  $\mu$ g/ $\mu$ l) (disruption) in 154 mM NaCl containing 0.1% Fast Green (Sigma) using a glass micropipette, followed by electroporation (27 V, five 50 ms pulses with 950 msec intervals). For forced *Hopx* expression, embryos were injected either with pCAGGS-empty (control, 1  $\mu$ g/ $\mu$ l) or with pCAGGS-m*Hopx* (1  $\mu$ g/ $\mu$ l) together with pCAGGS-EGFP (0.3  $\mu$ g/ $\mu$ l), followed by electroporation. Electroporated brains were dissected either at E18.5 or at P1 and immersed in 4% paraformaldehyde (PFA) in 120 mM phosphate buffer (pH 7.4) at room temperature followed by fixation for 20–30 h at 4°C.

### Analysis of specificity and efficiency of *Hopx* gene disruption

gRNAs targeting the *Hopx* gene were designed, and their efficiency to direct Cas9-mediated cutting of a *Hopx* PCR product was examined, using the methods described previously (Kalebic et al., 2016).

Predicted potential off-target sites of the *Hopx*-targeting gRNAs were identified using Crispor (crispor.tefor.net), with genome releases GRCm38/mm10 from UCSC Dec.2011 and GCA\_001632555.1 C57Bl/6NJ from NCBI as inputs. The same web-tool was used to generate the primer pairs to amplify the off-target amplicons of ~150 bp using the Primer3 algorithm. We included all off-targets with a cutting frequency determination (CFD) score higher than 0.03 in our analysis. The off-target sites, the CFD off-target scores, chromosomal locations and primer sequences are provided in Table S1.

For analyzing potential off-target effects upon CRISPR/Cas9-mediated disruption of *Hopx* gene expression, brains electroporated as described above were dissected at E18.5, followed by preparation of single-cell suspensions and isolation of PaprikaRFP-positive cells by FACS (10,000 cells per condition) as described below. DNA was isolated from the FACS-isolated cells by standard methods.

Amplicons of on-target and off-target sites were generated by PCR (1 ng DNA from the FACS-isolated cells per PCR) and subjected to Illumina sequencing. Reads were checked for their overall quality using FastQC (v0.11.2). Adapter read trimming was performed with Trimmomatic (v0.36), and paired-end data were merged using FLASH (v1.2.11) and mapped against amplicons with LAST. Amplicons with a coverage of at

least 1000 reads were analyzed for non-homologous end joining (NHEJ) events using CRISPResso. For this analysis, only regions complementary to the designed gRNAs plus 25 bp flanking regions were considered.

We assessed the efficiency of the *Hopx* gene disruption with regard to deleting the entire DNA sequence between the gRNA #10 and gRNA #13 target sites as follows. Amplicons containing both target sites and the sequence in between (if still present) were generated by PCR using the DNA from the FACS-isolated cells upon control electroporation and *Hopx* gene disruption. These amplicons were then examined for their size by agarose gel electrophoresis, and the intensity of the bands observed was measured by Fiji. The intensity values were corrected for the length of the respective amplicon.

### Isolation of bRGCs from mouse E18.5 medNcx

bRGCs were isolated from E18.5 medNcx of heterozygous *Tubb3*-GFP mouse embryos (pool of two litters) using a previously published method (Florio et al., 2015) with minor modifications. Briefly, the medNcx was subjected to DiI labeling from the basal (pial) side followed by incubation for 3 h at 37°C in an atmosphere of 95% O<sub>2</sub>/5% CO<sub>2</sub>. We then prepared a single-cell suspension, performed prominin 1 cell-surface staining, isolated DiI<sup>+</sup>GFP<sup>-</sup>prominin 1<sup>-</sup> cells (10,000) by FACS, and lysed the cells followed by storage at –80°C, as described previously (Florio et al., 2015).

### Population-level RNA-seq

Total RNA was isolated from the DiI<sup>+</sup>GFP<sup>-</sup>prominin 1<sup>-</sup> cells, a cDNA library was prepared, and cDNA subjected to Illumina sequencing, as described previously (Florio et al., 2015).

### Population-level transcriptome data analysis

Sequencing reads obtained from the mouse E18.5 medNcx-derived DiI<sup>+</sup>GFP<sup>-</sup>prominin 1<sup>-</sup> cells were checked for their overall quality using FastQC (v0.11.2). Alignments against the mouse genome reference assembly GRCm38 and quantification of genes of the Ensembl release v81 were carried out using STAR (v2.5.2b). For quality control, duplicated reads were tagged using Picard MarkDuplicates (v2.10.2) and analyzed with dupRadar (v1.8.0). Fastq files of the transcriptomes of mouse E14.5 latNcx-derived and GW15 human neocortex-derived cell populations published previously (Florio et al., 2015) were obtained from the European Nucleotide Archive (Accession Number SRP052294). Alignments and abundance estimation were performed with STAR (v2.5.2b) using Ensembl v81 as reference for mouse samples and Ensembl v88 for human samples. One-to-one orthologs between human and mouse (Ensembl v90) were used to combine the raw counts. Differential gene expression analysis of the combined data was performed with DESeq2 (v1.18.1) using an adjusted *P*-value cutoff of 0.01. Clustering of samples based on rlog normalized counts was visualized using principal component analysis and heatmap (v1.0.8).

### Single-cell RNA-seq and data analysis

Mouse E18.5 medNcx from ~5 mice was microdissected and pooled to generate a single-cell suspension using the MACS Neural Tissue Dissociation kit according to the manufacturer's instructions. Briefly, the tissue was digested with papain (Miltenyi Biotec, Enzyme Mix 1, 1 ml) for 15 min at 37°C on a rotating wheel, followed by addition of papain inhibitor (Enzyme Mix 2, 15  $\mu$ l). Tissue was dissociated using 10 gentle triturations (1 ml pipette tip) to obtain a single-cell suspension. Cells were collected by centrifugation at 300 *g* for 5 min and resuspended in 600  $\mu$ l of ice-cold PBS. Cell viability was assessed by Trypan Blue staining, determined using an automatic cell counter (Countess, Thermo Fisher Scientific) and found to amount to 90–95%.

Single cells were captured on a medium (10–17  $\mu$ m cell diameter) microfluidic chip for mRNA-seq using the Fluidigm C1 system. Cells were loaded onto the chip at a concentration of 400–500 cells/ $\mu$ l and imaged by phase contrast to assess the number of cells per capture site. cDNAs were prepared on chip using the SMARTer v4 Ultra Low RNA kit (Clontech). Size distribution and concentration of single-cell cDNA was assessed by high-throughput capillary gel electrophoresis (Fragment analyzer,

Advanced Analytical). Sequencing libraries were constructed in 96-well plates using the Illumina Nextera XT DNA Sample Preparation kit using set A and set B primers according to the protocol supplied by Fluidigm. Libraries were quantified by the Agilent Bioanalyzer using the High Sensitivity DNA analysis kit, as well as fluorometrically using the Qubit dsDNA HS Assay kits and a Qubit 2.0 fluorometer (Invitrogen).

Single-cell libraries were pooled, and each cell was sequenced using 100 bp paired-end reads on an Illumina HiSeq 2500 to a depth of greater than 1 million reads. Base calling, adaptor trimming and de-multiplexing was performed as described (Renaud et al., 2013, 2015). Reads were aligned to a Bowtie2 (Langmead and Salzberg, 2012)-indexed mouse genome (mm10 sourced from UCSC) using TopHat (Trapnell et al., 2009) with default settings. Transcript levels were quantified as transcripts per million (TPM), which were converted from fragments per kilobase of mapped reads (FPKM) generated by Cufflinks (Trapnell et al., 2010). We excluded cells with fewer than 1000 expressed genes.

Transcript levels were converted to the log-space by taking the  $\text{Log}_2$  TPM. R studio ([www.rstudio.com/](http://www.rstudio.com/)) was used to run R scripts to perform a principal component analysis (PCA, FactoMineR package) and hierarchical clustering (stats package), and to construct heatmaps, scatter plots and dendrograms. Software packages ggplot2 and gplots were used to generate data graphs. The Seurat package (Macosko et al., 2015) implemented in R was used to identify cell clusters and perform differential gene expression between the clusters. Specifically, we used the FindClusters command (default settings, resolution=0.7) that identifies clusters using a KNN graph based on Euclidean distance in the PCA space, refines edges based on Jacard Similarity and uses the Louvain algorithm to generate the final cell clusters. Cells were defined as Hopx positive when  $\text{Log}_2$  TPM was over 5.

### Ferret microarray data analysis

The previously published microarray dataset of P2 ferret neocortical zones (De Juan Romero et al., 2015) (GSE60687) were used to analyze the gene expression levels of the ferret orthologs of the previously identified human bRGC-enriched genes (Pollen et al., 2015). Of the latter 64 genes, 58 were found in the ferret dataset. For each of these 58 ortholog genes, the prospective gyrus/prospective sulcus ratio of the expression level in the OSVZ was calculated per probe and per replicate. Subsequently, for each gene, the ratio obtained for all probes and all replicates was averaged.

### Immunohistochemistry

Dissected embryonic mouse brain tissue was fixed with 4% PFA in 120 mM phosphate buffer (pH 7.4) for 30 min at room temperature, followed by overnight incubation at 4°C. For all postnatal stages, mouse pups were perfused transcardially with 10–15 ml of 4% PFA in 120 mM phosphate buffer (pH 7.4) at room temperature, followed by post-fixation for 20–30 h at 4°C. Fixed samples were incubated overnight at 4°C in 30% (wt/vol) sucrose in PBS, embedded in Tissue-TEK (OCT, Sakura Finetek) and stored at –20°C. Coronal cryosections (14  $\mu\text{m}$ ) and vibratome sections (70  $\mu\text{m}$ ) containing rostral or caudal neocortex were cut for immunohistochemistry.

For immunofluorescence, antigen retrieval was performed by incubating the sections, on the glass slide, in 0.01 M sodium citrate buffer for 60 min at 70°C, followed by incubation for 20 min at room temperature. Sections were further permeabilized with 0.3% (wt/vol) Triton X-100 in PBS for 30 min and quenched with 2 mM glycine in PBS for 30 min, followed by blocking with a solution containing 0.2% (wt/vol) gelatin, 300 mM NaCl and 0.3% (wt/vol) Triton X-100 in PBS (blocking buffer). Primary antibodies were diluted in blocking buffer and sections incubated with primary antibodies overnight at 4°C, except for the Hopx antibodies where sections were incubated for 2 days.

The following primary antibodies were used: Pax6 (PRB-278P, Covance, 1:200), Tbr2 (ab15894, Millipore, 1:500), pVim (ab22651, Abcam, 1:400), Sox2 (sc-17320, Santa Cruz, 1:200), Hopx (sc-30216 and sc-398703, Santa Cruz, 1:50), GFP (ab13970, Abcam, 1:1000; MPI-CBG, 1:1000), RFP (ab233, Evrogen, 1:1000), PCNA (CBL407, Millipore, 1:200), Olig2 (MABN50, Millipore, 1:200), S100 $\beta$  (ab868, Abcam, 1:50), NeuN (MAB377, Millipore, 1:50), PH3 (ab10543, Abcam, 1:500) and Satb2 (ab51502, Abcam, 1:200). Incubation with primary antibodies was followed by a 1 h incubation at room temperature with the appropriate A488-, A594-,

A555- or A647-labeled (Alexa series, Invitrogen, 1:1000) or Cy2- or Cy3-labeled (Jackson Laboratories, 1:200) secondary goat or donkey antibodies.

EdU was detected using the Click-It kit (Molecular Probes) according to the manufacturer's instructions.

All sections were counterstained with DAPI (Sigma, 1:500) during the secondary antibody incubation and mounted in Mowiol (Merck Biosciences).

### Image acquisition and quantification

Fluorescence images were acquired using a Zeiss LSM700 confocal microscope using 10 $\times$  and 40 $\times$  objectives. Images were taken as either 8.4  $\mu\text{m}$  (10 $\times$ ) or 1.2  $\mu\text{m}$  (40 $\times$ ) single optical sections. Images taken as tile scans were stitched together using the ZEN software (Zeiss). The VZ was identified as a densely packed Pax6<sup>+</sup> or Sox2<sup>+</sup> cell layer lining the ventricle. The SVZ or ISVZ were identified as a densely packed Tbr2<sup>+</sup> cell layer that is basally adjacent to the VZ. The OSVZ was defined as a zone that contains scattered Pax6<sup>+</sup>, Sox2<sup>+</sup> or Tbr2<sup>+</sup> cells. In the case of mouse lateral, ferret and human developing neocortex, the IZ was identified as a zone that is located in between the SVZ (in mouse) or OSVZ (in ferret and human) and the CP, identified as a densely packed DAPI<sup>+</sup> cell layer. The boundary between the OSVZ and IZ of mouse embryonic medNcx could not be determined with certainty, which is why we use the OSVZ/IZ labeling in the images. Quantifications were performed using the ZEN software and Fiji. Any pVim<sup>+</sup> cell 30  $\mu\text{m}$  from the apical surface was counted as a basal mitotic cell. Hopx immunoreactivity in RFP<sup>+</sup> cells was measured using Fiji. Briefly, an outline of RFP<sup>+</sup> cells was drawn and then the Hopx signal intensity per pixel was measured. Background signal intensity was measured in RFP<sup>+</sup> cells in the CP. Cells with a Hopx signal intensity per pixel above five arbitrary units after background subtraction were considered as Hopx<sup>+</sup> cells.

### Calculating neocortical gyrification index (nGI)

Calculation of GI was performed as in previous studies (Zilles et al., 1988; Lewitus et al., 2014). nGI values of 20 different species were calculated using images of Nissl-stained coronal sections from neuroscielibrary.org/ (for *Macropus fuliginosus*, *Procavia capensis*, *Trichechus manatus latirostris*, *Erimaceus europaeus*, *Felis catus*, *Vulpes vulpes*, *Phoca vitulina*, *Mustela putorius*, *Sus scrofa domesticus*, *Capra hircus domestica*, *Tursiops truncatus*, *Aotus trivirgatus*, *Eulemur mongoz*, *Macaca mulatta*, *Pan troglodytes*, *Homo sapiens* and *Hydrochaeris hydrochaeris*), brainmaps.org/ (for *Callithrix jacchus* and *Mus musculus*) and Orsini et al. (Orsini et al., 1977) (for *Galago senegalensis*). We used five sections, equally spaced along the rostral-caudal axis of the brain, for each species. The inner and outer contours of medNcx and latNcx were traced using Fiji.

### Statistical analysis

Data were tabulated with Excel (Microsoft) and analysed with Statcel3 (OMS, Japan) and MYSTAT (Systat Software, CA). Statistical tests: for two groups of observations that do not follow a normal distribution, the Mann–Whitney *U*-test was used. For two groups of observations that follow a normal distribution with equal variances, the two-tailed Student's *t*-test was used. For two groups of observations that follow a normal distribution with unequal variances, the two-tailed Welch's *t*-test was used. For normality test, the Shapiro–Wilk normality test was used. For homoscedasticity test, the *F* test was used. No animal or data points were excluded from the analyses, except for the dolphin in the regression analysis (least squares method) shown in Fig. S11. Studentised residual >3 was used to determine that the dolphin is an outlier. In all analyses, the investigators were not blinded to sample identity. Results were interpreted as statistically significant when  $P < 0.05$ .

### Acknowledgements

We are grateful to the services and facilities of the MPI-CBG for the outstanding support provided, notably Jussi Helppe and his team from the Animal Facility, Jan Peychl and his team from the Light Microscopy Facility, and Liane Funke of the DNA Sequencing Facility. We thank Andreas Dahl for RNA-seq, Nereo Kalebic for donating pD1321-AP-gLacZ, members of the Huttner laboratory for critical discussion, and Svante Pääbo for support of J.G.C. and B.T.

**Competing interests**

The authors declare no competing or financial interests.

**Author contributions**

Conceptualization: S.V., T.N.; Validation: S.V., T.N.; Formal analysis: S.V., J.G.C., L.H., C.E.-O., A.-K.H., S.W., H.B., M.S., B.T., W.B.H., T.N.; Investigation: S.V., J.G.C., L.H., C.E.-O., A.-K.H., S.W., H.B., M.S., B.T., T.N.; Writing - original draft: S.V., W.B.H., T.N.; Writing - review & editing: S.V., J.G.C., L.H., C.E.-O., A.-K.H., S.W., H.B., M.S., B.T., W.B.H., T.N.; Supervision: W.B.H.; Funding acquisition: W.B.H.

**Funding**

T.N. was supported by a long-term fellowship from the Yamada Science Foundation. W.B.H. was supported by grants from the Deutsche Forschungsgemeinschaft (DFG) (SFB 655, A2), the European Research Council (250197) and ERA-NET NEURON (MicroKin).

**Data availability**

The datasets used to generate Fig. 5 and Figs S4 and S5 have been deposited in NCBI Gene Expression Omnibus under accession numbers GSE120976 and GSE121008.

**Supplementary information**

Supplementary information available online at <http://dev.biologists.org/lookup/doi/10.1242/dev.169276.supplemental>

**References**

- Arai, Y., Pulvers, J. N., Haffner, C., Schilling, B., Nüsslein, I., Calegari, F. and Huttner, W. B. (2011). Neural stem and progenitor cells shorten S-phase on commitment to neuron production. *Nat. Commun.* **2**, 154.
- Attardo, A., Calegari, F., Haubensak, W., Wilsch-Bräuninger, M. and Huttner, W. B. (2008). Live imaging at the onset of cortical neurogenesis reveals differential appearance of the neuronal phenotype in apical versus basal progenitor progeny. *PLoS ONE* **3**, e2388.
- Bae, B.-I., Jayaraman, D. and Walsh, C. A. (2015). Genetic changes shaping the human brain. *Dev. Cell* **32**, 423-434.
- Betizeau, M., Cortay, V., Patti, D., Pfister, S., Gautier, E., Bellemin-Ménard, A., Afanassieff, M., Huissoud, C., Douglas, R. J., Kennedy, H. et al. (2013). Precursor diversity and complexity of lineage relationships in the outer subventricular zone of the primate. *Neuron* **80**, 442-457.
- Borrell, V. and Götz, M. (2014). Role of radial glial cells in cerebral cortex folding. *Curr. Opin. Neurobiol.* **27**, 39-46.
- Chen, F., Rosiene, J., Che, A., Becker, A. and LoTurco, J. (2015). Tracking and transforming neocortical progenitors by CRISPR/Cas9 gene targeting and piggyBac transposase lineage labeling. *Development* **142**, 3601-3611.
- De Juan Romero, C., Bruder, C., Tomasello, U., Sanz-Anquela, J. M. and Borrell, V. (2015). Discrete domains of gene expression in germinal layers distinguish the development of gyrencephaly. *EMBO J.* **34**, 1859-1874.
- De Toni, A., Zbinden, M., Epstein, J. A., Ruiz i Altaba, A., Prochiantz, A. and Caille, I. (2008). Regulation of survival in adult hippocampal and glioblastoma stem cell lineages by the homeodomain-only protein HOP. *Neural Dev.* **3**, 13.
- Dehay, C., Kennedy, H. and Kosik, K. S. (2015). The outer subventricular zone and primate-specific cortical complexification. *Neuron* **85**, 683-694.
- Englund, C., Fink, A., Lau, C., Pham, D., Daza, R. A., Bulfone, A., Kowalczyk, T. and Hevner, R. F. (2005). Pax6, Tbr2, and Tbr1 are expressed sequentially by radial glia, intermediate progenitor cells, and postmitotic neurons in developing neocortex. *J. Neurosci.* **25**, 247-251.
- Fernández, V., Llinares-Benadero, C. and Borrell, V. (2016). Cerebral cortex expansion and folding: what have we learned?. *EMBO J.* **35**, 1021-1044.
- Fietz, S. A., Kelava, I., Vogt, J., Wilsch-Bräuninger, M., Stenzel, D., Fish, J. L., Corbeil, D., Riehn, A., Distler, W., Nitsch, R. et al. (2010). OSVZ progenitors of human and ferret neocortex are epithelial-like and expand by integrin signaling. *Nat. Neurosci.* **13**, 690-699.
- Fietz, S. A., Lachmann, R., Brandl, H., Kircher, M., Samusik, N., Schroder, R., Lakshmanaperumal, N., Henry, I., Vogt, J., Riehn, A. et al. (2012). Transcriptomes of germinal zones of human and mouse fetal neocortex suggest a role of extracellular matrix in progenitor self-renewal. *Proc. Natl. Acad. Sci. USA* **109**, 11836-11841.
- Florio, M. and Huttner, W. B. (2014). Neural progenitors, neurogenesis and the evolution of the neocortex. *Development* **141**, 2182-2194.
- Florio, M., Albert, M., Taverna, E., Namba, T., Brandl, H., Lewitus, E., Haffner, C., Sykes, A., Wong, F. K., Peters, J. et al. (2015). Human-specific gene ARHGAP11B promotes basal progenitor amplification and neocortex expansion. *Science* **347**, 1465-1470.
- Götz, M. and Huttner, W. B. (2005). The cell biology of neurogenesis. *Nat. Rev. Mol. Cell Biol.* **6**, 777-788.
- Götz, M., Stoykova, A. and Gruss, P. (1998). Pax6 controls radial glia differentiation in the cerebral cortex. *Neuron* **21**, 1031-1044.
- Hansen, D. V., Lui, J. H., Parker, P. R. L. and Kriegstein, A. R. (2010). Neurogenic radial glia in the outer subventricular zone of human neocortex. *Nature* **464**, 554-561.
- Hevner, R. F. (2016). Evolution of the mammalian dentate gyrus. *J. Comp. Neurol.* **524**, 578-594.
- Kaas, J. H. (2013). The evolution of brains from early mammals to humans. *Wiley Interdiscip. Rev. Cognit. Sci.* **4**, 33-45.
- Kalebic, N., Taverna, E., Tavano, S., Wong, F. K., Suchold, D., Winkler, S., Huttner, W. B. and Sarov, M. (2016). CRISPR/Cas9-induced disruption of gene expression in mouse embryonic brain and single neural stem cells in vivo. *EMBO Rep.* **17**, 338-348.
- Kelava, I., Lewitus, E. and Huttner, W. B. (2013). The secondary loss of gyrencephaly as an example of evolutionary phenotypical reversal. *Front. Neuroanat.* **7**, 16.
- Langmead, B. and Salzberg, S. L. (2012). Fast gapped-read alignment with Bowtie 2. *Nat. Methods* **9**, 357-359.
- Lein, E. S., Belgard, T. G., Hawrylycz, M. and Molnár, Z. (2017). Transcriptomic perspectives on neocortical structure, development, evolution, and disease. *Annu. Rev. Neurosci.* **40**, 629-652.
- Lewitus, E., Kelava, I., Kalinka, A. T., Tomancak, P. and Huttner, W. B. (2014). An adaptive threshold in mammalian neocortical evolution. *PLoS Biol.* **12**, e1002000.
- Li, D., Takeda, N., Jain, R., Manderfield, L. J., Liu, F., Li, L., Anderson, S. A. and Epstein, J. A. (2015). Hopx distinguishes hippocampal from lateral ventricle neural stem cells. *Stem Cell Res.* **15**, 522-529.
- Lodato, S. and Arlotta, P. (2015). Generating neuronal diversity in the mammalian cerebral cortex. *Annu. Rev. Cell Dev. Biol.* **31**, 699-720.
- Lui, J. H., Hansen, D. V. and Kriegstein, A. R. (2011). Development and evolution of the human neocortex. *Cell* **146**, 18-36.
- Macosko, E. Z., Basu, A., Satija, R., Nemesh, J., Shekhar, K., Goldman, M., Tirosh, I., Bialas, A. R., Kamitaki, N., Martersteck, E. M. et al. (2015). Highly parallel genome-wide expression profiling of individual cells using nanoliter droplets. *Cell* **161**, 1202-1214.
- Mariotto, A., Pavlova, O., Park, H.-S., Huber, M. and Hohl, D. (2016). HOPX: The unusual homeodomain-containing protein. *J. Invest. Dermatol.* **136**, 905-911.
- Martínez-Cerdeño, V., Cunningham, C. L., Camacho, J., Antczak, J. L., Prakash, A. N., Cziep, M. E., Walker, A. I. and Noctor, S. C. (2012). Comparative analysis of the subventricular zone in rat, ferret and macaque: evidence for an outer subventricular zone in rodents. *PLoS ONE* **7**, e30178.
- Martínez-Martínez, M. A., De Juan Romero, C., Fernández, V., Cárdenas, A., Götz, M. and Borrell, V. (2016). A restricted period for formation of outer subventricular zone defined by Cdh1 and Trnp1 levels. *Nat. Commun.* **7**, 11812.
- Mitchell, C. and Silver, D. L. (2018). Enhancing our brains: Genomic mechanisms underlying cortical evolution. *Semin. Cell Dev. Biol.* **76**, 23-32.
- Mühlfriedel, S., Kirsch, F., Gruss, P., Stoykova, A. and Chowdhury, K. (2005). A roof plate-dependent enhancer controls the expression of Homeodomain only protein in the developing cerebral cortex. *Dev. Biol.* **283**, 522-534.
- Mühlfriedel, S., Kirsch, F., Gruss, P., Chowdhury, K. and Stoykova, A. (2007). Novel genes differentially expressed in cortical regions during late neurogenesis. *Eur. J. Neurosci.* **26**, 33-50.
- Namba, T. and Huttner, W. B. (2017). Neural progenitor cells and their role in the development and evolutionary expansion of the neocortex. *Wiley Interdiscip. Rev. Dev. Biol.* **6**, e256.
- Namba, T., Kibe, Y., Funahashi, Y., Nakamura, S., Takano, T., Ueno, T., Shimada, A., Kozawa, S., Okamoto, M., Shimoda, Y. et al. (2014). Pioneering axons regulate neuronal polarization in the developing cerebral cortex. *Neuron* **81**, 814-829.
- Nowakowski, T. J., Pollen, A. A., Sandoval-Espinosa, C. and Kriegstein, A. R. (2016). Transformation of the radial glia scaffold demarcates two stages of human cerebral cortex development. *Neuron* **91**, 1219-1227.
- O'Leary, M. A., Bloch, J. I., Flynn, J. J., Gaudin, T. J., Giallombardo, A., Giannini, N. P., Goldberg, S. L., Kraatz, B. P., Luo, Z.-X., Meng, J. et al. (2013). The placental mammal ancestor and the post-K-Pg radiation of placentals. *Science* **339**, 662-667.
- Ono, K., Takebayashi, H. and Ikenaka, K. (2009). Olig2 transcription factor in the developing and injured forebrain; cell lineage and glial development. *Mol. Cells* **27**, 397-401.
- Orsini, J. G., Christolomme, A., Dupe-Godet, M. and Riche, D. (1977). Stereotaxic brain atlas of the prosimian primate galago senegalensis. *Mammalia* **41**, 445-515.
- Osumi, N., Shinohara, H., Numayama-Tsuruta, K. and Maekawa, M. (2008). Concise review: Pax6 transcription factor contributes to both embryonic and adult neurogenesis as a multifunctional regulator. *Stem Cells* **26**, 1663-1672.
- Pollen, A. A., Nowakowski, T. J., Chen, J., Retallack, H., Sandoval-Espinosa, C., Nicholas, C. R., Shuga, J., Liu, S. J., Oldham, M. C., Diaz, A. et al. (2015). Molecular Identity of Human Outer Radial Glia during Cortical Development. *Cell* **163**, 55-67.
- Rakic, P. (2009). Evolution of the neocortex: a perspective from developmental biology. *Nat. Rev. Neurosci.* **10**, 724-735.

- Reillo, I., de Juan Romero, C., García-Cabezas, M. A. and Borrell, V. (2011). A role for intermediate radial glia in the tangential expansion of the mammalian cerebral cortex. *Cereb. Cortex* **21**, 1674-1694.
- Renaud, G., Kircher, M., Stenzel, U. and Kelso, J. (2013). freeBis: an efficient basecaller with calibrated quality scores for Illumina sequencers. *Bioinformatics* **29**, 1208-1209.
- Renaud, G., Stenzel, U., Maricic, T., Wiebe, V. and Kelso, J. (2015). deML: robust demultiplexing of Illumina sequences using a likelihood-based approach. *Bioinformatics* **31**, 770-772.
- Sanides, F. (1969). Comparative architectonics of the neocortex of mammals and their evolutionary interpretation. *Ann. N Y Acad. Sci.* **167**, 404-423.
- Shinmyo, Y., Tanaka, S., Tsunoda, S., Hosomichi, K., Tajima, A. and Kawasaki, H. (2016). CRISPR/Cas9-mediated gene knockout in the mouse brain using in utero electroporation. *Sci. Rep.* **6**, 20611.
- Shitamukai, A., Konno, D. and Matsuzaki, F. (2011). Oblique radial glial divisions in the developing mouse neocortex induce self-renewing progenitors outside the germinal zone that resemble primate outer subventricular zone progenitors. *J. Neurosci.* **31**, 3683-3695.
- Smart, I. H. M., Dehay, C., Giroud, P., Berland, M. and Kennedy, H. (2002). Unique morphological features of the proliferative zones and postmitotic compartments of the neural epithelium giving rise to striate and extrastriate cortex in the monkey. *Cereb. Cortex* **12**, 37-53.
- Sousa, A. M. M., Meyer, K. A., Santpere, G., Gulden, F. O. and Sestan, N. (2017). Evolution of the Human Nervous System Function, Structure, and Development. *Cell* **170**, 226-247.
- Stahl, R., Walcher, T., De Juan Romero, C., Pilz, G. A., Cappello, S., Irmiler, M., Sanz-Aguela, J. M., Beckers, J., Blum, R., Borrell, V. et al. (2013). Trmp1 regulates expansion and folding of the Mammalian cerebral cortex by control of radial glial fate. *Cell* **153**, 535-549.
- Striedter, G. F., Srinivasan, S. and Monuki, E. S. (2015). Cortical folding: when, where, how, and why?. *Annu. Rev. Neurosci.* **38**, 291-307.
- Sun, T. and Hevner, R. F. (2014). Growth and folding of the mammalian cerebral cortex: from molecules to malformations. *Nat. Rev. Neurosci.* **15**, 217-232.
- Taverna, E., Götz, M. and Huttner, W. B. (2014). The cell biology of neurogenesis: toward an understanding of the development and evolution of the neocortex. *Annu. Rev. Cell Dev. Biol.* **30**, 465-502.
- Thomsen, E. R., Mich, J. K., Yao, Z., Hodge, R. D., Doyle, A. M., Jang, S., Shehata, S. I., Nelson, A. M., Shapovalova, N. V., Levi, B. P. et al. (2016). Fixed single-cell transcriptomic characterization of human radial glial diversity. *Nat. Methods* **13**, 87-93.
- Trapnell, C., Pachter, L. and Salzberg, S. L. (2009). TopHat: discovering splice junctions with RNA-Seq. *Bioinformatics* **25**, 1105-1111.
- Trapnell, C., Williams, B. A., Pertea, G., Mortazavi, A., Kwan, G., van Baren, M. J., Salzberg, S. L., Wold, B. J. and Pachter, L. (2010). Transcript assembly and quantification by RNA-Seq reveals unannotated transcripts and isoform switching during cell differentiation. *Nat. Biotechnol.* **28**, 511-515.
- Turrero García, M., Chang, Y. J., Arai, Y. and Huttner, W. B. (2016). S-phase duration is the main target of cell cycle regulation in neural progenitors of developing ferret neocortex. *J. Comp. Neurol.* **524**, 456-470.
- Wang, X., Tsai, J.-W., LaMonica, B. and Kriegstein, A. R. (2011). A new subtype of progenitor cell in the mouse embryonic neocortex. *Nat. Neurosci.* **14**, 555-561.
- Wang, L., Hou, S. and Han, Y.-G. (2016). Hedgehog signaling promotes basal progenitor expansion and the growth and folding of the neocortex. *Nat. Neurosci.* **19**, 888-896.
- Wong, F. K., Fei, J.-F., Mora-Bermúdez, F., Taverna, E., Haffner, C., Fu, J., Anastassiadis, K., Stewart, A. F. and Huttner, W. B. (2015). Sustained Pax6 expression generates primate-like basal radial glia in developing mouse neocortex. *PLoS Biol.* **13**, e1002217.
- Zilles, K., Armstrong, E., Schleicher, A. and Kretschmann, H.-J. (1988). The human pattern of gyrification in the cerebral cortex. *Anat. Embryol.* **179**, 173-179.
